# Supplementary material for: Frequency–risk relationships between second-hand smoke exposure and respiratory symptoms among adolescents: a cross-sectional study in South China
Source: PubMed Central journal article supplement — BMJ Open. 2018 Apr 3;8(4):e019875. doi: 10.1136/bmjopen-2017-019875 (PMC5892781; doi:10.1136/bmjopen-2017-019875), 2018-04-03
Supplement: bmjopen-2017-019875.draft_revisions.pdf [file bmjopen-2017-019875.draft_revisions.pdf]

# BMJ Open

BMJ Open is committed to open peer review. As part of this commitment we make the peer review history of every article we publish publicly available.

When an article is published we post the peer reviewers' comments and the authors' responses online. We also post the versions of the paper that were used during peer review. These are the versions that the peer review comments apply to.

The versions of the paper that follow are the versions that were submitted during the peer review process. They are not the versions of record or the final published versions. They should not be cited or distributed as the published version of this manuscript.

BMJ Open is an open access journal and the full, final, typeset and author-corrected version of record of the manuscript is available on our site with no access controls, subscription charges or pay-per-view fees (<http://bmjopen.bmj.com>).

If you have any questions on BMJ Open's open peer review process please email [info.bmjopen@bmj.com](mailto:info.bmjopen@bmj.com)

# BMJ Open

## Frequency-risk relationships between second-hand smoke exposure and respiratory symptoms among adolescents in Guangzhou, China

|                                 |                                                                                                                                                                                                                                                                                                                                                                                                                                                                                            |
|---------------------------------|--------------------------------------------------------------------------------------------------------------------------------------------------------------------------------------------------------------------------------------------------------------------------------------------------------------------------------------------------------------------------------------------------------------------------------------------------------------------------------------------|
| Journal:                        | <i>BMJ Open</i>                                                                                                                                                                                                                                                                                                                                                                                                                                                                            |
| Manuscript ID                   | bmjopen-2017-019875                                                                                                                                                                                                                                                                                                                                                                                                                                                                        |
| Article Type:                   | Research                                                                                                                                                                                                                                                                                                                                                                                                                                                                                   |
| Date Submitted by the Author:   | 04-Oct-2017                                                                                                                                                                                                                                                                                                                                                                                                                                                                                |
| Complete List of Authors:       | Chen, Zhiyao; Guangdong Pharmaceutical University<br>Liu, Guocong; Guangzhou Yuexiu Center for Disease Control and Prevention<br>Li, Shunming; Guangdong Pharmaceutical University<br>Jiang, Ting; Guangzhou Yuexiu Center for Disease Control and Prevention<br>Xu, Bin; Guangzhou Yuexiu Center for Disease Control and Prevention<br>Chen, Jianying; Guangzhou Yuexiu District for Community Health Service Center of Baiyun Street<br>Ye, Xiaohua; Guangdong Pharmaceutical University |
| <b>Primary Subject Heading</b>: | Smoking and tobacco                                                                                                                                                                                                                                                                                                                                                                                                                                                                        |
| Secondary Subject Heading:      | Epidemiology, Public health, Respiratory medicine, Smoking and tobacco                                                                                                                                                                                                                                                                                                                                                                                                                     |
| Keywords:                       | second-hand smoke exposure, respiratory symptoms, adolescents                                                                                                                                                                                                                                                                                                                                                                                                                              |
|                                 |                                                                                                                                                                                                                                                                                                                                                                                                                                                                                            |

SCHOLARONE™  
Manuscripts

only

1  
2  
3  
4 **1 Frequency-risk relationships between second-hand smoke exposure and**  
5  
6 **2 respiratory symptoms among adolescents in Guangzhou, China**  
7

8  
9 3 Zhiyao Chen MPH <sup>1,#</sup>, Guocong Liu MPH <sup>2,#</sup>, Shunming Li MPH <sup>1</sup>, Ting Jiang BS <sup>2</sup>, Bin Xu MPH <sup>2</sup>,  
10  
11 4 Jianying Chen BS <sup>3,\*</sup>, Xiaohua Ye PhD <sup>1,\*</sup>

12  
13 <sup>1</sup> School of Public Health, Guangdong Pharmaceutical University, Guangzhou, China.

14  
15 <sup>2</sup>Health Education Section, Guangzhou Yuexiu Center for Disease Control and Prevention,  
16  
17 Guangzhou, China.

18  
19 <sup>3</sup>General Department, Guangzhou Yuexiu District for Community Health Service Center of  
20  
21 Baiyun Street, Guangzhou, China

22  
23  
24  
25  
26  
27  
28  
29  
30  
31  
32  
33  
34  
35  
36  
37  
38  
39  
40  
41  
42  
43  
44  
45  
46  
47  
48  
49  
50  
51  
52  
53  
54  
55  
56  
57  
58  
59  
60

11 **\*Correspondence to:** Dr Xiaohua Ye, smalltomato@163.com; or Jianying Chen,  
12 jianyc@163.com.

13 <sup>#</sup> These authors contributed equally to this work.

15 **Word counts** of the manuscript (excluding references): 2587

1  
2  
3 20 **ABSTRACT**

4 21 **Objectives:** Although previous studies have suggested an association between second-hand smoke  
5  
6  
7 22 (SHS) exposure and respiratory symptoms, current evidence is inconsistent. Additionally, it  
8  
9  
10 23 remains unclear whether there are frequency-risk relationships between SHS exposure and  
11  
12 24 respiratory symptoms among adolescents.

13  
14 25 **Methods:** A cross-sectional survey was conducted using a stratified cluster sampling method to  
15  
16  
17 26 obtain representative students. The univariable and multivariable logistic regression models were  
18  
19  
20 27 fitted to explore the potential frequency-risk relationships between SHS exposure and respiratory  
21  
22 28 symptoms.

23  
24 29 **Results:** Among 3575 students, the prevalence of SHS exposure was 49.5% in indoor public  
25  
26  
27 30 places, 34.5% in homes, 22.7% in indoor campuses, and 29.2% in outdoor campuses. There were  
28  
29  
30 31 significantly increased risks of respiratory symptoms corresponding to SHS exposure in public  
31  
32 32 places (odds ratio [OR]=1.60, 95% CI 1.30-1.95), in homes (OR=1.53, 95% CI 1.25-1.87), in  
33  
34 33 indoor campuses (OR = 1.43, 95% CI 1.14-1.79) and in outdoor campuses (OR = 1.37, 95% CI  
35  
36 34 1.10-1.69) using no exposure as reference. Notably, we also observed monotonically  
37  
38 35 frequency-risk relationships between setting-specific (e.g., homes, public places, and campuses)  
39  
40  
41 36 SHS exposure and respiratory symptoms.

42  
43  
44 37 **Conclusion:** Our findings suggest that setting-specific SHS exposure is associated with a  
45  
46 38 significant, dose-dependent increase in risk of respiratory symptoms.  
47  
48

49 39  
50  
51  
52  
53  
54  
55  
56  
57  
58  
59  
60

1  
2  
3  
4 **40 Strengths and limitations of this study**

5  
6 41 ■ SHS exposure in indoor and outdoor campuses is at a high level, which suggests poor  
7  
8 42 compliance with the full smoke-free ban in schools and supports growing concern about SHS  
9  
10  
11 43 exposure in campuses.

12  
13 44 ■ The most striking findings from this study were that there were monotonically increasing  
14  
15 45 frequency-risk relationships between SHS exposure and respiratory symptoms.

16  
17  
18 46 ■ The findings highlight the need for further longitudinal studies to establish the causal  
19  
20 47 relationship and its biological mechanisms.  
21  
22

23 48  
24  
25  
26  
27  
28  
29  
30  
31  
32  
33  
34  
35  
36  
37  
38  
39  
40  
41  
42  
43  
44  
45  
46  
47  
48  
49  
50  
51  
52  
53  
54  
55  
56  
57  
58  
59  
60

## 49 INTRODUCTION

50 It is well established that inhaling second-hand smoke (SHS) is harmful and that no  
51 scientific evidence establishes a risk-free level of exposure.<sup>1,2</sup> To note, a retrospective  
52 analysis of data from 192 countries revealed that 40% of children (including 35% of  
53 female non-smokers and 33% of male non-smokers) were exposed to SHS, which  
54 results in an annual estimate of 603000 deaths attributable to SHS.<sup>3</sup> Global youth  
55 tobacco surveillance also reported that nearly half the adolescents worldwide were  
56 exposed to SHS at home (42.5%) and in public places (55.1%), which constitutes a  
57 substantial public health threat and demands urgent intervention.<sup>4</sup> In recent years,  
58 much attention has been focused on SHS exposure in public places and in homes, but  
59 there is limited information in published reports regarding SHS exposure in indoor  
60 and outdoor campuses among adolescents.

61 Increasing epidemiological studies of adolescents have demonstrated the  
62 relations between SHS exposure and respiratory symptoms (such as nose irritation,  
63 coughing, and sore throat),<sup>5-8</sup> but current evidence is inconsistent. Some studies  
64 demonstrated significant positive associations in adolescents,<sup>9,10</sup> while the report from  
65 Malaysian adolescents revealed no association.<sup>11</sup> To note, it was unclear whether there  
66 are dose-response relationships between SHS exposure and respiratory symptoms.  
67 Furthermore, SHS exposure occurs in varying amounts in public places, homes, and  
68 other indoor spaces, but few studies have differentiated SHS exposure in indoor and  
69 outdoor to make the setting-specific relations between SHS exposure and respiratory  
70 symptoms clearer. Of particular concern is that little is known about the effects of

1  
2  
3  
4 71 SHS exposure from indoor and outdoor campuses on respiratory symptoms, although  
5  
6 72 a significant body of literature has associated indoor SHS exposure with respiratory  
7  
8 73 symptoms. This study builds on previous literature to explore setting-specific (e.g.,  
9  
10  
11 74 public places, homes, and campuses) and frequency-risk relationships between SHS  
12  
13 75 exposure and respiratory symptoms among adolescents.  
14  
15  
16  
17

## 18 77 **METHODS**

### 19 20 78 **Ethics statement**

21  
22  
23 79 The study was approved by the Ethics Committee of Guangdong Pharmaceutical  
24  
25 80 University, and it was performed in accordance with the approved guidelines. This  
26  
27  
28 81 survey was qualified as involving no risks to participants. All participants provided an  
29  
30 82 informed consent regarding the goals of the study and the willingness to participate.  
31  
32  
33  
34

### 35 84 **Study design and data collection**

36  
37  
38 85 This cross-sectional study was conducted in Guangzhou city, China, from March to  
39  
40 86 April 2016. The target population was high school students in Guangzhou city. A  
41  
42 87 stratified cluster sampling process was used to obtain a representative sample. In the  
43  
44  
45 88 first stage, all high schools were divided into two categories (prestigious or  
46  
47 89 non-prestigious schools) according to level of education and the education quality.  
48  
49  
50 90 Three high schools were randomly sampled from prestigious schools, and four high  
51  
52 91 schools were randomly sampled from non-prestigious schools, with the probability of  
53  
54  
55 92 selection proportional to the number of the schools. In the second stage, classes in the  
56  
57  
58  
59  
60

1  
2  
3  
4 93 selected schools were randomly sampled with proportional to school enrollment size,  
5  
6 94 and all students in sampled classes were eligible to participate.  
7

8 95 All interviewers in each school were centrally trained to ensure that the survey  
9  
10 96 was carried out according to the protocol and that operation procedures were identical  
11  
12 97 across all areas. After obtaining informed consent, eligible students were asked to  
13  
14 98 complete a face-to-face survey by trained interviewers. A total of 3833 participants  
15  
16 99 were enrolled in the study, and the effective response rate was 95.4% (3657/3833). To  
17  
18 100 note, only non-smokers were included in the analyses and a total of 3575 non-smokers  
19  
20  
21 101 were included in this study.  
22  
23  
24  
25  
26  
27

### 28 103 **Study variables**

29  
30 104 The main outcome variable was self-reported respiratory symptoms. The respiratory  
31  
32 105 symptoms were defined as persistent coughed or sputum for 3 consecutive months in  
33  
34 106 a row during the past 12 months, as had been used in previous studies.<sup>12-14</sup> The main  
35  
36  
37 107 independent variable of respiratory symptoms was self-reported SHS exposure, which  
38  
39 108 was defined as non-smokers' inhalation of the smoke exhaled from smokers on  $\geq 1$  day  
40  
41 109 a week for at least the last six months.<sup>1</sup> SHS exposure was asked separately in indoor  
42  
43  
44 110 public places, in homes, in indoor campuses and in outdoor campuses. Frequency of  
45  
46  
47 111 SHS exposure was continuous data (days/week), and was also categorized into three  
48  
49 112 groups: <1 day/week (no exposure), '1-4 days/week' and '5-7 days/week'. Smoking  
50  
51 113 status was classified as non-smokers and smokers (defined as 'has smoked over 100  
52  
53  
54 114 cigarettes in their lifetime').  
55  
56  
57  
58  
59  
60



1  
2  
3  
4 115 Covariates including potential mediators and confounders were chosen a priori  
5  
6 116 on the basis of literature review. Potential covariates in our study included age (year),  
7  
8 117 gender (male or female), grade (4-5 or 1-2), only-child (yes or no), monthly pocket  
9  
10 118 money ( $<¥100$ ,  $¥100-399$ , or  $\geq ¥400$ ), prestigious school (yes or no), father's  
11  
12 119 education (primary school, middle school, or university and above), mother's  
13  
14 120 education (primary school, middle school, or university and above), and asthma  
15  
16 121 history (yes or no).  
17  
18  
19  
20  
21  
22

### 23 **Data analysis**

24  
25 124 All data were entered in duplicate into EpiData version 3.1 database (The EpiData  
26  
27 125 Association, Odense Denmark). The univariable and multivariable logistic regression  
28  
29 126 models were fitted to calculate the odds ratios (ORs) and 95% confidence intervals  
30  
31 127 (CIs) for evaluating the frequency-risk relationships between SHS exposure  
32  
33 128 (including ordinal and continuous variables) and respiratory symptoms. Linear trends  
34  
35 129 of SHS exposure were assessed by modeling exposure as continuous variables  
36  
37 130 (arithmetic or logarithmic scale) or ordinal variables in multivariable models.  
38  
39 131 Two-sided p-value of  $\leq 0.05$  was regarded as being of statistical significance. All  
40  
41 132 statistical analyses were conducted using Stata version 14.0 (StataCorp LP, College  
42  
43 133 Station, Texas, USA).  
44  
45  
46  
47  
48  
49

50 134

## 51 **RESULTS**

### 52 **Characteristics of the sample**

1  
2  
3  
4 137 Sample characteristics are given in [Table 1](#). A total of 3575 non-smoking students  
5  
6 138 were interviewed, of whom 477 (13.3%) were classified as having respiratory  
7  
8 139 symptoms. Participants' mean age was  $15.0 \pm 1.8$  years, and 50.9% were male  
9  
10  
11 140 students. About 62.2% of the students were the only child in their family and 63.4%  
12  
13 141 from prestigious schools. The prevalence of SHS exposure in indoor public places,  
14  
15 142 homes, indoor campuses, and outdoor campuses was 49.5%, 34.5%, 22.7% and  
16  
17 143 29.2%, respectively.  
18  
19  
20  
21 144

#### 22 23 145 **Relation between binary SHS exposure and respiratory symptoms**

24  
25 146 [Table 2](#) shows the relations between binary SHS exposure and respiratory symptoms.  
26  
27  
28 147 The prevalence of respiratory symptoms was significantly higher in students with  
29  
30 148 SHS exposure (OR=1.60, 95% CI 1.30-1.95, for SHS in indoor public places;  
31  
32 149 OR=1.53, 95% CI 1.25-1.87, for SHS in homes; OR = 1.43, 95% CI 1.14-1.79, for  
33  
34 150 SHS in indoor campuses) than in those with no exposure. Similar positive  
35  
36  
37 151 associations were observed among students with SHS exposure in indoor campuses  
38  
39 152 from smoking teachers (OR =1.34, 95% CI 1.05-1.71) or from smoking classmates  
40  
41 153 (OR = 1.54, 95% CI 1.15-2.06). To note, the effects of SHS exposure in outdoor  
42  
43 154 campuses cannot be ignored. Students with SHS exposure in outdoor campuses had  
44  
45 155 significantly higher rates of respiratory symptoms (OR = 1.37, 95% CI 1.10-1.69) as  
46  
47 156 compared with unexposed students, and there were similar positive associations  
48  
49 157 between respiratory symptoms and SHS exposure in outdoor campuses from smoking  
50  
51 158 teachers (OR =1.38, 95% CI 1.09-1.75) or from smoking classmates (OR = 1.33, 95%

1  
2  
3  
4 159 CI 1.03-1.71).

5  
6 160

7  
8  
9 161 **Relation between ordinal SHS exposure and respiratory symptoms**

10  
11 162 [Table 3](#) indicates the relations between ordinal frequency of SHS exposure and  
12  
13 163 respiratory symptoms. Compared with no SHS exposure, ordinal frequency of SHS  
14  
15 164 exposure was associated with respiratory symptoms in a increasing manner (SHS in  
16  
17 165 public places: OR=1 for no exposure, OR=1.50 for 1-4 days/week, OR=1.87 for 5-7  
18  
19 166 days/week,  $p$  for linear trend <0.001; SHS in indoor campuses: OR=1 for no exposure,  
20  
21 167 OR=1.24 for 1-4 days/week, OR=1.84 for 5-7 days/week,  $p$  for linear trend <0.001).

22  
23 168 When examining the relations by source of exposure, significant increasing trends  
24  
25 169 were observed for SHS exposure in indoor campuses from smoking teachers ( $p$  for  
26  
27 170 linear trend =0.001) and from smoking classmates ( $p$  for linear trend =0.005).

28  
29 171 Additionally, there was a significantly increasing relation between ordinal frequency  
30  
31 172 of SHS exposure in outdoor campuses and respiratory symptoms (OR=1 for no  
32  
33 173 exposure, OR=1.28 for 1-4 days/week, OR=1.56 for 5-7 days/week,  $p$  for linear trend  
34  
35 174 =0.007), and similar increasing trends were observed for SHS exposure in outdoor  
36  
37 175 campuses from smoking teachers ( $p$  for linear trend =0.004) and from smoking  
38  
39 176 classmates ( $p$  for linear trend =0.006). However, no increasing trend was observed for  
40  
41 177 SHS exposure in homes.

42  
43  
44 178

45  
46 179 **Relation between continuous SHS exposure and respiratory symptoms**

47  
48 180 [Table 4](#) presents the relations between continuous frequency of SHS exposure and  
49  
50

1  
2  
3  
4 181 respiratory symptoms. There are significant frequency-risk relationships between  
5  
6 182 indoor SHS exposure and respiratory symptoms (OR = 2.30, 95% CI: 1.67-3.16, for  
7  
8 183 SHS in indoor public places; OR = 1.64, 95% CI: 1.23-2.20, for SHS in homes; OR =  
9  
10 184 2.09, 95% CI: 1.42-3.07, for SHS in indoor campuses; OR = 1.70, 95% CI: 1.18-2.47,  
11  
12 185 for SHS in outdoor campuses). When examining the relations by source of exposure,  
13  
14 186 there were similar frequency-risk relationships for SHS exposure in indoor or outdoor  
15  
16 187 campuses from smoking teachers or from smoking classmates. Additionally, we  
17  
18 188 observed a monotonically increasing frequency-risk trend for SHS exposure in indoor  
19  
20 189 public places (Figure 1A), in homes (Figure 1B), in indoor campuses (Figure 2A) or  
21  
22 190 in outdoor campuses (Figure 2B). When examining these trends by source of  
23  
24 191 exposure, there were similar increasing frequency-risk trends for SHS exposure from  
25  
26 192 smoking teachers (Figure 3A for indoor SHS and Figure 3B for outdoor SHS) and  
27  
28 193 from smoking classmates (Figure 4A for indoor SHS and Figure 4B for outdoor SHS).

34  
35  
36 194

## 37 195 **DISCUSSION**

38  
39 196 This observational study showed that non-smoking students with setting-specific  
40  
41 197 (public places, homes, or campuses) SHS exposure experienced significantly higher  
42  
43 198 risks of respiratory symptoms than those with no exposure. The most striking findings  
44  
45 199 from this study were that there were monotonically increasing frequency-risk  
46  
47 200 relationships between setting-specific SHS exposure and respiratory symptoms. When  
48  
49 201 examining these relations by source of exposure, there were similar monotonically  
50  
51 202 increasing frequency-risk relationships for SHS exposure from smoking teachers and  
52  
53  
54  
55  
56  
57  
58  
59  
60

1  
2  
3  
4 203 from smoking classmates.  
5

6 204 It is well known that there is no risk-free level of exposure to SHS. According to  
7  
8 205 the partial smoke-free legislation implemented in Guangzhou on 1 September 2010,  
9  
10 206 full smoke-free ban covered indoor campuses, outdoor campuses and most indoor  
11  
12 207 public places, but did not cover homes. It is disappointing that SHS exposure or  
13  
14 208 smoking behaviors in schools were not eliminated, and were still at a high level  
15  
16 209 (22.7% for SHS exposure in indoor campuses; 29.2% for SHS exposure in outdoor  
17  
18 210 campuses). This observation may be due to poor compliance with the full smoke-free  
19  
20 211 ban in campuses, since we observed that SHS exposure among students was mainly  
21  
22 212 from smoking teachers (indoor SHS: 17.8%; outdoor SHS: 18.4%) and smoking  
23  
24 213 classmates (indoor SHS: 11.9%; outdoor SHS:19.6%) in both indoor and outdoor  
25  
26 214 campuses. Similarly, a recent population-based study in Tehran showed that 29.3%  
27  
28 215 and 29.2% non-smoker students have been exposed to SHS from smoking teachers in  
29  
30 216 indoor and outdoor campuses, respectively, and another survey of Chinese college  
31  
32 217 students reported that 37% of non-smokers had SHS exposure from smoking teachers.  
33  
34 218 <sup>15,16</sup> More disappointing was that SHS exposure in indoor public places among  
35  
36 219 students was remarkably high in 49.5% in this study, which is similar to the latest  
37  
38 220 study on adult SHS exposure in Guangzhou (50.3%) and the Global Youth Tobacco  
39  
40 221 Survey (47.8%).<sup>17,18</sup> However, very few respondents (1-2%) reported smoking in  
41  
42 222 enclosed public places in England after the implementation of comprehensive  
43  
44 223 smoke-free legislation covering all enclosed public places and workplaces.<sup>19</sup> These  
45  
46 224 findings point out the urgent need for a comprehensive smoke-free legislation  
47  
48  
49  
50  
51  
52  
53  
54  
55  
56  
57  
58  
59  
60

1  
2  
3  
4 225 covering all public places in Guangzhou to protect the public from SHS hazards.  
5

6 226 A few published studies have indicated that SHS exposure may be a risk factor of  
7  
8 227 respiratory symptoms, but the potential relation for setting-specific exposure was still  
9  
10 228 unclear.<sup>20-23</sup> Recent studies of Chinese adolescents indicated that there was a positive  
11  
12  
13 229 relation between household SHS exposure and respiratory symptoms, but the relation  
14  
15 230 for SHS exposure in workplaces or in schools was unknown.<sup>20,21</sup> In addition, the  
16  
17  
18 231 surveys of London casino workers and Shanghai workers revealed that there was an  
19  
20 232 association between SHS exposure at work and respiratory symptoms, but the  
21  
22 233 association for SHS exposure in homes or in schools was unknown.<sup>22,23</sup> To note, the  
23  
24 234 influence of SHS exposure from indoor campuses on respiratory symptoms is still  
25  
26  
27 235 unclear, and the potential dose-response association between frequency of SHS  
28  
29 236 exposure and respiratory symptoms is also uncertain. Our study builds on previous  
30  
31 237 literature by exploring the potential dose-response relationships and differentiating  
32  
33 238 SHS exposure in homes, public places, and campuses to make exposure and potential  
34  
35 239 relations clearer. We found that there were positive relations and frequency-risk  
36  
37 240 relationships between setting-specific (public places, homes, or campuses) SHS  
38  
39 241 exposure and respiratory symptoms. When examining the relations by source of  
40  
41 242 exposure, there was still evidence of similar dose-response relationships for SHS  
42  
43 243 exposure in indoor campuses from smoking teachers and smoking classmates. These  
44  
45 244 findings provided new evidence of dose-response relationships between  
46  
47 245 setting-specific SHS exposure and respiratory symptoms among adolescents, and  
48  
49 246 further research is needed to establish the causal relationship and its biological  
50  
51  
52  
53  
54  
55  
56  
57  
58  
59  
60

1  
2  
3  
4 247 mechanisms.

5  
6 248 Globally, outdoor smoking restrictions are uncommon, though the  
7  
8 249 outdoor-campus smoking bans implemented in Guangzhou City on 1 September 2010.  
9  
10 250 A few published studies have indicated that smoking increases PM<sub>2.5</sub> concentrations in  
11  
12 251 outdoor areas to levels that are potentially hazardous to health,<sup>24,25</sup> but research  
13  
14 252 linking SHS exposures from outdoor environments to health effects is still limit.  
15  
16 253 Notably, the potential relation between outdoor SHS exposure and respiratory  
17  
18 254 symptoms is still unclear. To our knowledge, this is the first study to reveal the  
19  
20 255 relation between SHS exposure in outdoor campuses and respiratory symptoms  
21  
22 256 among adolescents, and found that outdoor SHS exposure was positively associated  
23  
24 257 with respiratory symptoms in a monotonically increasing trend. When examining the  
25  
26 258 relations by source of exposure, there were still similar frequency-risk relationships  
27  
28 259 for SHS exposure in outdoor campuses from smoking teachers and smoking  
29  
30 260 classmates. These findings provide more evidence for the adverse effects of outdoor  
31  
32 261 SHS exposure on human respiratory symptoms, and also support growing concern  
33  
34 262 about SHS exposure in outdoor campuses.  
35  
36  
37  
38  
39  
40  
41

42 263 The most meaningful advantage of this study is that we contributes additionally  
43  
44 264 to the literature by exploring the potential frequency-risk relationships and  
45  
46 265 differentiating SHS exposure in specific settings (e.g., indoor or outdoor; public  
47  
48 266 places, homes, or campuses) and specific sources (e.g., from smoking teachers or  
49  
50 267 from smoking classmates) to make exposure and potential relations clearer. There are  
51  
52 268 also some potential limitations in this study. First, all data were self-reported,  
53  
54  
55  
56  
57  
58  
59  
60

1  
2  
3  
4 269 including SHS exposure and respiratory symptoms. For SHS exposure, although  
5  
6 270 biochemical measures can give objective measurements, the biomarkers cannot  
7  
8 271 distinguish the sources of exposure, the key factors in this study. Previous survey has  
9  
10 272 found that school children are capable of reporting their health conditions reliably,<sup>26</sup>  
11  
12 273 and the presence of frequent cough and phlegm was quite obvious to the students and  
13  
14 274 explicit in the question to avoid measurement error. Second, causal association  
15  
16 275 between SHS exposure and respiratory symptoms could not be ascertained due to the  
17  
18 276 cross-sectional design. However, the notion of reverse causation that students with  
19  
20 277 respiratory symptoms deliberately increased their exposure to noxious SHS seems  
21  
22 278 improbable. The strong association observed in other studies also supported our data  
23  
24 279 validity and provided support for the deduction of causation.<sup>20,27,28</sup> Finally, few people  
25  
26 280 would be completely unexposed to SHS in densely populated Guangzhou even now,  
27  
28 281 when smoking was still allowed in public places such as amusement parks, restaurants,  
29  
30 282 workplaces, and so on. Therefore, the control groups who reported no SHS exposure  
31  
32 283 have probably underestimated their exposure, and the risk for respiratory symptoms in  
33  
34 284 these groups would also be underestimated.

35  
36 285 In conclusion, SHS exposure in indoor and outdoor campuses is still at a high  
37  
38 286 level, which suggests poor compliance with the full smoke-free ban in schools and  
39  
40 287 supports growing concern about SHS exposure in campuses. Additionally, this study  
41  
42 288 contributes to the literature by finding monotonically increasing frequency-risk  
43  
44 289 relationships between SHS exposure and respiratory symptoms among adolescents in  
45  
46 290 addition to differentiating SHS exposure in specific settings and specific sources to  
47  
48  
49  
50  
51  
52  
53  
54  
55  
56



1  
2  
3  
4 291 make these relationships clearer. Future longitudinal studies are needed to establish  
5  
6 292 the causal relationship and its biological mechanisms.  
7

8  
9 293

10  
11 294 **Contributors**

12  
13 295 CZ, LG, LS, JT, XB, CJ and YX were involved in the design of the study, data  
14  
15 296 analysis and writing of the draft of the manuscript. All the authors read and approved  
16  
17 297 the final version of the manuscript.  
18  
19

20  
21 298

22  
23 299 **Competing interests None.**

24  
25 300

26  
27  
28 301 **Ethics approval**

29  
30 302 The Ethics Committee of Guangdong Pharmaceutical University.  
31  
32  
33  
34  
35  
36  
37  
38  
39  
40  
41  
42  
43  
44  
45  
46  
47  
48  
49  
50  
51  
52  
53  
54  
55  
56  
57  
58  
59  
60

303 **References**

- 304 1. Makadia LD, Roper PJ, Andrews JO, Tingen MS. Tobacco Use and Smoke Exposure in Children:  
305 New Trends, Harm, and Strategies to Improve Health Outcomes. *Curr Allergy Asthma Rep.*  
306 2017;17(8):55.
- 307 2. Office on S, Health. Publications and Reports of the Surgeon General. *The Health Consequences*  
308 *of Involuntary Exposure to Tobacco Smoke: A Report of the Surgeon General.* Atlanta (GA):  
309 Centers for Disease Control and Prevention (US); 2006.
- 310 3. Oberg M, Jaakkola MS, Woodward A, Peruga A, Pruss-Ustun A. Worldwide burden of disease  
311 from exposure to second-hand smoke: a retrospective analysis of data from 192 countries. *Lancet.*  
312 2011;377(9760):139-146.
- 313 4. Warren CW, Jones NR, Peruga A, et al. Global youth tobacco surveillance, 2000-2007. *MMWR*  
314 *Surveill Summ.* 2008;57(1):1-28.
- 315 5. Hisam A, Rahman MU, Kadir E, Azam N, Masood S. Proportion of exposure of passive smoking  
316 in teenage group and symptoms precipitated after exposure to second hand smoke. *J Coll*  
317 *Physicians Surg Pak.* 2014;24(6):446-448.
- 318 6. Schick SF, van den Vossenberg G, Luo A, et al. Thirty minute-exposure to aged cigarette smoke  
319 increases nasal congestion in nonsmokers. *J Toxicol Environ Health A.* 2013;76(10):601-613.
- 320 7. Kabir Z, Manning PJ, Holohan J, Keogan S, Goodman PG, Clancy L. Second-hand smoke  
321 exposure in cars and respiratory health effects in children. *Eur Respir J.* 2009;34(3):629-633.
- 322 8. Clark BR, Burkett SA, Andridge RR, Buckley TJ. Evidence of high rates of undiagnosed asthma  
323 in central Ohio elementary schoolchildren. *J Sch Health.* 2013;83(12):896-906.
- 324 9. Jang AS, Choi IS, Lee S, et al. The effect of passive smoking on asthma symptoms, atopy, and  
325 airway hyperresponsiveness in schoolchildren. *J Korean Med Sci.* 2004;19(2):214-217.
- 326 10. Bakoula CG, Kafritsa YJ, Kavadias GD, et al. Objective passive-smoking indicators and  
327 respiratory morbidity in young children. *Lancet.* 1995;346(8970):280-281.
- 328 11. Zulkifli A, Abidin NZ, Abidin EZ, et al. Burden of household smoking habits on the occurrence of  
329 respiratory symptoms among Malaysian adolescents. *Iranian Journal of Public Health.*  
330 2014;43(3):42-52.
- 331 12. Peters J, Hedley AJ, Wong CM, et al. Effects of an ambient air pollution intervention and  
332 environmental tobacco smoke on children's respiratory health in Hong Kong. *Int J Epidemiol.*  
333 1996;25(4):821-828.
- 334 13. Cotes JE, Chinn DJ. MRC questionnaire (MRCQ) on respiratory symptoms. *Occupational*  
335 *Medicine.* 2007;57(5):388-388.
- 336 14. Ho SY, Wang MP, Lo WS, et al. Comprehensive smoke-free legislation and displacement of  
337 smoking into the homes of young children in Hong Kong. *Tob Control.* 2010;19(2):129-133.
- 338 15. Emami H, Naserikouzehgarani G, Saeedfar K, Shiraz AR. The Correlation of Student's Smoking  
339 and Their Perceived Exposure to Their Teacher's Smoking in Tehran: A Population Based Study.  
340 *Journal of Shahid Sadoughi University of Medical Sciences.* 2010;18(2).
- 341 16. Gong M, Liang ZY, Zhang YY, Shadel WG, Zhou L, Xiao J. Implementation of the Tobacco-Free  
342 Campus Policy on College Campuses: Evidence From a Survey of College Students in Beijing.  
343 *Nicotine Tob Res.* 2016;18(11):2083-2091.
- 344 17. Exposure to secondhand smoke among students aged 13-15 years--worldwide, 2000-2007.  
345 *MMWR Morb Mortal Wkly Rep.* 2007;56(20):497-500.

- 1  
2  
3 346 18. Ye X, Yao Z, Gao Y, et al. Second-hand smoke exposure in different types of venues: before and  
4 347 after the implementation of smoke-free legislation in Guangzhou, China. *BMJ Open*.  
5 348 2014;4(2):e004273.  
6  
7 349 19. Lee JT, Glantz SA, Millett C. Effect of smoke-free legislation on adult smoking behaviour in  
8 350 England in the 18 months following implementation. *PLoS One*. 2011;6(6):e20933.  
9 351 20. Leung LT, Ho SY, Wang MP, Lo WS, Lam TH. Exposure to secondhand smoke from neighbours  
10 352 and respiratory symptoms in never-smoking adolescents in Hong Kong: a cross-sectional study.  
11 353 *BMJ Open*. 2015;5(11):e008607.  
12 354 21. He QQ, Wong TW, Du L, et al. Environmental tobacco smoke exposure and Chinese  
13 355 schoolchildren's respiratory health: a prospective cohort study. *Am J Prev Med*.  
14 356 2011;41(5):487-493.  
15 357 22. Pilkington PA, Gray S, Gilmore AB. Health impacts of exposure to second hand smoke (SHS)  
16 358 amongst a highly exposed workforce: survey of London casino workers. *BMC Public Health*.  
17 359 2007;7:257.  
18 360 23. Zheng P, Li W, Chapman S, Zhang Z, Gao J, Fu H. Workplace exposure to secondhand smoke and  
19 361 its association with respiratory symptoms--a cross-sectional study among workers in Shanghai.  
20 362 *Tob Control*. 2011;20(1):58-63.  
21 363 24. Licht AS, Hyland A, Travers MJ, Chapman S. Secondhand smoke exposure levels in outdoor  
22 364 hospitality venues: a qualitative and quantitative review of the research literature. *Tob Control*.  
23 365 2013;22(3):172-179.  
24 366 25. Stafford J, Daube M, Franklin P. Second hand smoke in alfresco areas. *Health Promot J Austr*.  
25 367 2010;21(2):99-105.  
26 368 26. Riley AW. Evidence that school-age children can self-report on their health. *Ambul Pediatr*.  
27 369 2004;4(4 Suppl):371-376.  
28 370 27. Lai HK, Ho SY, Wang MP, Lam TH. Secondhand smoke and respiratory symptoms among  
29 371 adolescent current smokers. *Pediatrics*. 2009;124(5):1306-1310.  
30 372 28. Lam TH, Chung SF, Betson CL, Wong CM, Hedley AJ. Respiratory symptoms due to active and  
31 373 passive smoking in junior secondary school students in Hong Kong. *Int J Epidemiol*.  
32 374 1998;27(1):41-48.  
33  
34  
35  
36  
37  
38  
39 375

1  
2  
3  
4 376 **Figure Legends**

5  
6 377 **Figure 1.** Predicted prevalence of respiratory symptoms based on second-hand smoke  
7  
8 378 exposure (A: exposure in indoor public places; B: exposure in homes).  
9

10  
11 379

12  
13 380 **Figure 2.** Predicted prevalence of respiratory symptoms based on second-hand smoke  
14  
15 381 exposure in campuses (A: exposure in indoor campuses; B: exposure in outdoor  
16  
17 382 campuses).  
18  
19

20  
21 383

22  
23 384 **Figure 3.** Predicted prevalence of respiratory symptoms based on second-hand smoke  
24  
25 385 exposure from smoking teachers (A: exposure in indoor campuses; B: exposure in  
26  
27 386 outdoor campuses).  
28  
29

30  
31 387

32  
33 388 **Figure 4.** Predicted prevalence of respiratory symptoms based on second-hand smoke  
34  
35 389 exposure from smoking classmates (A: exposure in indoor campuses; B: exposure in  
36  
37 390 outdoor campuses).  
38

39  
40 391  
41  
42  
43  
44  
45  
46  
47  
48  
49  
50  
51  
52  
53  
54  
55  
56  
57  
58  
59  
60

392 **Table 1.** Demographic characteristics of the study participants

| Characteristics                      | <i>n</i> | %    | Characteristics         | <i>n</i> | %    |
|--------------------------------------|----------|------|-------------------------|----------|------|
| Respiratory symptoms                 |          |      | Grade                   |          |      |
| No                                   | 3098     | 86.7 | 1-2                     | 2329     | 65.2 |
| Yes                                  | 477      | 13.3 | 4-5                     | 1246     | 34.8 |
| SHS exposure in indoor public places |          |      | Only-child              |          |      |
| No                                   | 1806     | 50.5 | No                      | 1353     | 37.8 |
| Yes                                  | 1769     | 49.5 | Yes                     | 2222     | 62.2 |
| SHS exposure in homes                |          |      | Prestigious school      |          |      |
| No                                   | 2342     | 65.5 | No                      | 1307     | 36.6 |
| Yes                                  | 1233     | 34.5 | Yes                     | 2268     | 63.4 |
| SHS exposure in indoor campuses      |          |      | Pocket money monthly(¥) |          |      |
| No                                   | 2763     | 77.3 | <100                    | 2039     | 57.0 |
| Yes                                  | 812      | 22.7 | 100-399                 | 1125     | 31.5 |
| SHS exposure in outdoor campuses     |          |      | ≥400                    | 411      | 11.5 |
| No                                   | 2532     | 70.8 | Father's education      |          |      |
| Yes                                  | 1043     | 29.2 | Primary school          | 838      | 23.4 |
| Gender                               |          |      | Middle school           | 1215     | 34.0 |
| Male                                 | 1818     | 50.9 | University and above    | 1522     | 42.6 |
| Female                               | 1757     | 49.1 | Mother's education      |          |      |
| Asthma history                       |          |      | Primary school          | 978      | 27.4 |
| No                                   | 3514     | 98.3 | Middle school           | 1165     | 32.6 |
| Yes                                  | 61       | 1.7  | University and above    | 1432     | 40.1 |

393 *n*, number of participants; %, the proportion of participants.

394

395

396 **Table 2.** Relation between binary SHS exposure and respiratory symptoms

| SHS exposure                                             | <i>n</i> | Respiratory symptoms (%) | Unadjusted OR(95%CI) | Adjusted OR(95%CI) <sup>a</sup> |
|----------------------------------------------------------|----------|--------------------------|----------------------|---------------------------------|
| SHS exposure in indoor public places                     |          |                          |                      |                                 |
| No                                                       | 1806     | 200(11.1)                | 1.00                 | 1.00                            |
| Yes                                                      | 1769     | 277(15.7)                | 1.49(1.23-1.81)      | 1.60(1.30-1.95)                 |
| SHS exposure in homes                                    |          |                          |                      |                                 |
| No                                                       | 2342     | 275(11.7)                | 1.00                 | 1.00                            |
| Yes                                                      | 1233     | 202(16.4)                | 1.47(1.21-1.79)      | 1.53(1.25-1.87)                 |
| SHS exposure in indoor campuses                          |          |                          |                      |                                 |
| No                                                       | 2763     | 338(12.2)                | 1.00                 | 1.00                            |
| Yes                                                      | 812      | 139(17.1)                | 1.48(1.19-1.84)      | 1.43(1.14-1.79)                 |
| SHS exposure in indoor campuses from smoking teachers    |          |                          |                      |                                 |
| No                                                       | 2940     | 369(12.6)                | 1.00                 | 1.00                            |
| Yes                                                      | 635      | 108(17.0)                | 1.43(1.13-1.80)      | 1.34(1.05-1.71)                 |
| SHS exposure in indoor campuses from smoking classmates  |          |                          |                      |                                 |
| No                                                       | 3149     | 399(12.7)                | 1.00                 | 1.00                            |
| Yes                                                      | 426      | 78(18.3)                 | 1.54(1.18-2.02)      | 1.54(1.15-2.06)                 |
| SHS exposure in outdoor campuses                         |          |                          |                      |                                 |
| No                                                       | 2532     | 309(12.2)                | 1.00                 | 1.00                            |
| Yes                                                      | 1043     | 168(16.1)                | 1.38(1.13-1.69)      | 1.37(1.10-1.69)                 |
| SHS exposure in outdoor campuses from smoking teachers   |          |                          |                      |                                 |
| No                                                       | 2917     | 362(12.4)                | 1.00                 | 1.00                            |
| Yes                                                      | 658      | 115(17.5)                | 1.49(1.19-1.88)      | 1.38(1.09-1.75)                 |
| SHS exposure in outdoor campuses from smoking classmates |          |                          |                      |                                 |
| No                                                       | 2873     | 366(12.7)                | 1.00                 | 1.00                            |
| Yes                                                      | 702      | 111(15.8)                | 1.29(1.02-1.62)      | 1.33(1.03-1.71)                 |

397 *n*, number of participants; SHS, second-hand smoke; OR, odds ratio; CI, confidence interval.398 <sup>a</sup>: adjusted for gender (male vs female), grade (4-5 vs 1-2), only-child (yes vs no) and asthma  
399 history (yes vs no).

400

401 **Table 3.** Relation between ordinal frequency of SHS exposure and respiratory symptoms

| Frequency of SHS exposure                                | <i>n</i> | Respiratory symptoms (%) | Unadjusted OR(95%CI) | Adjusted OR(95%CI) <sup>a</sup> |
|----------------------------------------------------------|----------|--------------------------|----------------------|---------------------------------|
| SHS exposure in indoor public places                     |          |                          |                      |                                 |
| No exposure                                              | 1806     | 200(11.1)                | 1.00                 | 1.00                            |
| 1-4 days/week                                            | 1242     | 184(14.8)                | 1.40(1.13-1.73)      | 1.50(1.20-1.86)                 |
| 5-7 days/week                                            | 527      | 93(17.7)                 | 1.72(1.32-2.25)      | 1.87(1.41-2.46)                 |
| p for linear trend                                       |          |                          | <0.001               | <0.001                          |
| SHS exposure in homes                                    |          |                          |                      |                                 |
| No exposure                                              | 2342     | 275(11.7)                | 1.00                 | 1.00                            |
| 1-4 days/week                                            | 570      | 97(17.0)                 | 1.54(1.20-1.98)      | 1.62(1.25-2.09)                 |
| 5-7 days/week                                            | 663      | 105(15.8)                | 1.41(1.11-1.80)      | 1.45(1.13-1.87)                 |
| p for linear trend                                       |          |                          | <sup>b</sup>         | <sup>b</sup>                    |
| SHS exposure in indoor campuses                          |          |                          |                      |                                 |
| No exposure                                              | 2763     | 338(12.2)                | 1.00                 | 1.00                            |
| 1-4 days/week                                            | 539      | 81(15.0)                 | 1.27(0.98-1.65)      | 1.24(0.95-1.63)                 |
| 5-7 days/week                                            | 273      | 58(21.3)                 | 1.94(1.42-2.64)      | 1.84(1.32-2.56)                 |
| p for linear trend                                       |          |                          | <0.001               | <0.001                          |
| SHS exposure in indoor campuses from smoking teachers    |          |                          |                      |                                 |
| No exposure                                              | 2940     | 369(12.6)                | 1.00                 | 1.00                            |
| 1-4 days/week                                            | 412      | 59(14.3)                 | 1.16(0.87-1.57)      | 1.13(0.84-1.53)                 |
| 5-7 days/week                                            | 223      | 49(22.0)                 | 1.96(1.40-2.74)      | 1.78(1.25-2.53)                 |
| p for linear trend                                       |          |                          | <0.001               | 0.001                           |
| SHS exposure in indoor campuses from smoking classmates  |          |                          |                      |                                 |
| No exposure                                              | 3149     | 399(12.7)                | 1.00                 | 1.00                            |
| 1-4 days/week                                            | 271      | 45(16.6)                 | 1.37(0.98-1.92)      | 1.38(0.97-1.97)                 |
| 5-7 days/week                                            | 155      | 33(21.3)                 | 1.86(1.25-2.78)      | 1.84(1.20-2.82)                 |
| p for linear trend                                       |          |                          | <0.001               | 0.005                           |
| SHS exposure in outdoor campuses                         |          |                          |                      |                                 |
| No exposure                                              | 2532     | 309(12.2)                | 1.00                 | 1.00                            |
| 1-4 days/week                                            | 704      | 105(14.9)                | 1.26(0.99-1.60)      | 1.28(1.01-1.64)                 |
| 5-7 days/week                                            | 339      | 63(18.6)                 | 1.64(1.22-2.21)      | 1.56(1.13-2.15)                 |
| p for linear trend                                       |          |                          | <0.001               | 0.007                           |
| SHS exposure in outdoor campuses from smoking teachers   |          |                          |                      |                                 |
| No exposure                                              | 2917     | 362(12.4)                | 1.00                 | 1.00                            |
| 1-4 days/week                                            | 456      | 71(15.6)                 | 1.30(0.99-1.72)      | 1.24(0.94-1.64)                 |
| 5-7 days/week                                            | 202      | 44(21.8)                 | 1.97(1.38-2.79)      | 1.74(1.20-2.50)                 |
| p for linear trend                                       |          |                          | <0.001               | 0.004                           |
| SHS exposure in outdoor campuses from smoking classmates |          |                          |                      |                                 |
| No exposure                                              | 2873     | 366(12.7)                | 1.00                 | 1.00                            |
| 1-4 days/week                                            | 451      | 62(13.8)                 | 1.09(0.82-1.46)      | 1.16(0.86-1.57)                 |
| 5-7 days/week                                            | 251      | 49(19.5)                 | 1.66(1.19-2.31)      | 1.66(1.16-2.39)                 |
| p for linear trend                                       |          |                          | <0.001               | 0.006                           |

402 *n*, number of participants; SHS, second-hand smoke; OR, odds ratio; CI, confidence interval.403 <sup>a</sup>: adjusted for gender (male vs female), grade (4-5 vs 1-2), only-child (yes vs no) and asthma  
404 history (yes vs no).405 <sup>b</sup>: No estimate of *p* value for linear trend is provide since no linear trend was observed.

406 **Table 4.** Relation between continuous frequency of SHS exposure and respiratory symptoms

| Frequency of SHS exposure<br>(days/week, logarithmic scale) | $\beta$ | SE   | Z    | p-value | OR(95% CI)      |
|-------------------------------------------------------------|---------|------|------|---------|-----------------|
| SHS exposure in indoor public places                        |         |      |      |         |                 |
| Univariable regression                                      | 0.73    | 0.16 | 4.68 | <0.001  | 2.06(1.52-2.80) |
| Multivariable regression <sup>a</sup>                       | 0.83    | 0.16 | 5.11 | <0.001  | 2.30(1.67-3.16) |
| SHS exposure in homes                                       |         |      |      |         |                 |
| Univariable regression                                      | 0.45    | 0.14 | 3.14 | 0.002   | 1.56(1.18-2.07) |
| Multivariable regression <sup>a</sup>                       | 0.49    | 0.15 | 3.32 | 0.001   | 1.64(1.23-2.20) |
| SHS exposure in indoor campuses                             |         |      |      |         |                 |
| Univariable regression                                      | 0.78    | 0.18 | 4.30 | <0.001  | 2.19(1.53-3.12) |
| Multivariable regression <sup>a</sup>                       | 0.74    | 0.20 | 3.77 | <0.001  | 2.09(1.42-3.07) |
| SHS exposure in indoor campuses from smoking teachers       |         |      |      |         |                 |
| Univariable regression                                      | 0.82    | 0.20 | 4.16 | <0.001  | 2.27(1.54-3.33) |
| Multivariable regression <sup>a</sup>                       | 0.72    | 0.21 | 3.47 | 0.001   | 2.06(1.37-3.09) |
| SHS exposure in indoor campuses from smoking classmates     |         |      |      |         |                 |
| Univariable regression                                      | 0.71    | 0.23 | 3.11 | 0.002   | 2.04(1.30-3.20) |
| Multivariable regression <sup>a</sup>                       | 0.69    | 0.25 | 2.77 | 0.006   | 2.00(1.22-3.26) |
| SHS exposure in outdoor campuses                            |         |      |      |         |                 |
| Univariable regression                                      | 0.58    | 0.17 | 3.32 | 0.001   | 1.79(1.27-2.51) |
| Multivariable regression <sup>a</sup>                       | 0.53    | 0.19 | 2.82 | 0.005   | 1.70(1.18-2.47) |
| SHS exposure in outdoor campuses from smoking teachers      |         |      |      |         |                 |
| Univariable regression                                      | 0.93    | 0.20 | 4.65 | <0.001  | 2.53(1.71-3.74) |
| Multivariable regression <sup>a</sup>                       | 0.78    | 0.21 | 3.72 | <0.001  | 2.20(1.45-3.33) |
| SHS exposure in outdoor campuses from smoking classmates    |         |      |      |         |                 |
| Univariable regression                                      | 0.44    | 0.20 | 2.22 | 0.027   | 1.55(1.05-2.30) |
| Multivariable regression <sup>a</sup>                       | 0.45    | 0.22 | 2.08 | 0.037   | 1.58(1.03-2.42) |

407 SHS, second-hand smoke; OR, odds ratio; CI, confidence interval.

408 <sup>a</sup>: adjusted for gender (male vs female), grade (4-5 vs 1-2), only-child (yes vs no) and asthma  
409 history (yes vs no).

410



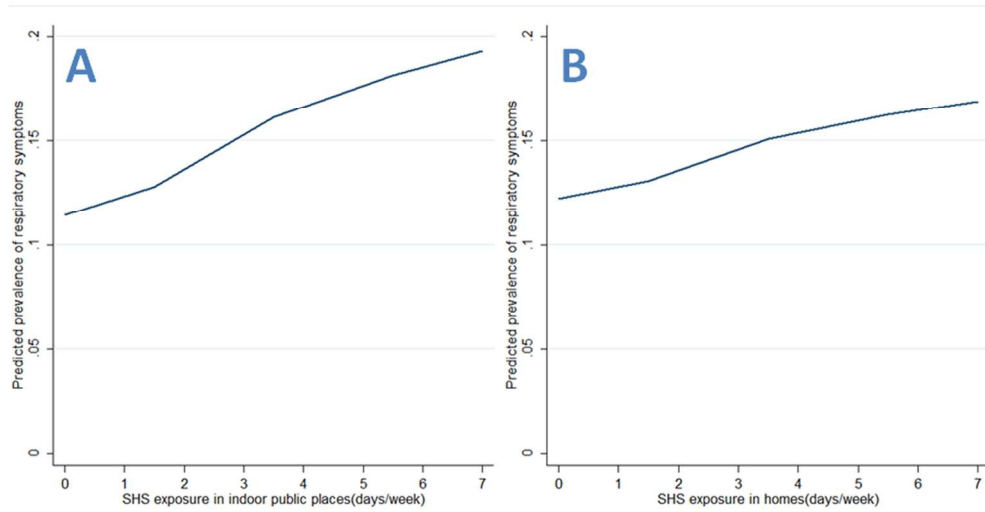

Figure 1. Predicted prevalence of respiratory symptoms based on second-hand smoke exposure (A: exposure in indoor public places; B: exposure in homes).

124x63mm (300 x 300 DPI)

review only

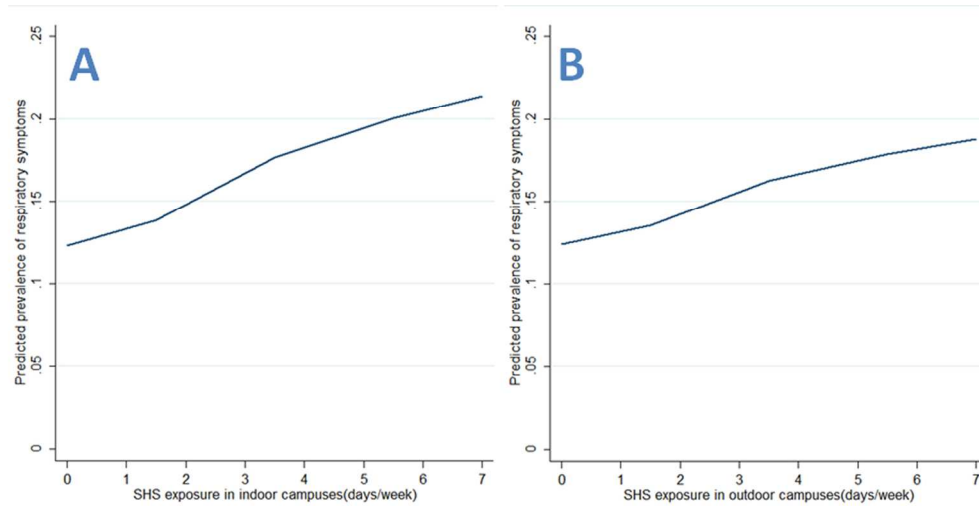

Figure 2. Predicted prevalence of respiratory symptoms based on second-hand smoke exposure in campuses (A: exposure in indoor campuses; B: exposure in outdoor campuses).

125x64mm (300 x 300 DPI)

1  
2  
3  
4  
5  
6  
7  
8  
9  
10  
11  
12  
13  
14  
15  
16  
17  
18  
19  
20  
21  
22  
23  
24  
25  
26  
27  
28  
29  
30  
31  
32  
33  
34  
35  
36  
37  
38  
39  
40  
41  
42  
43  
44  
45  
46  
47  
48  
49  
50  
51  
52  
53  
54  
55  
56  
57  
58  
59  
60

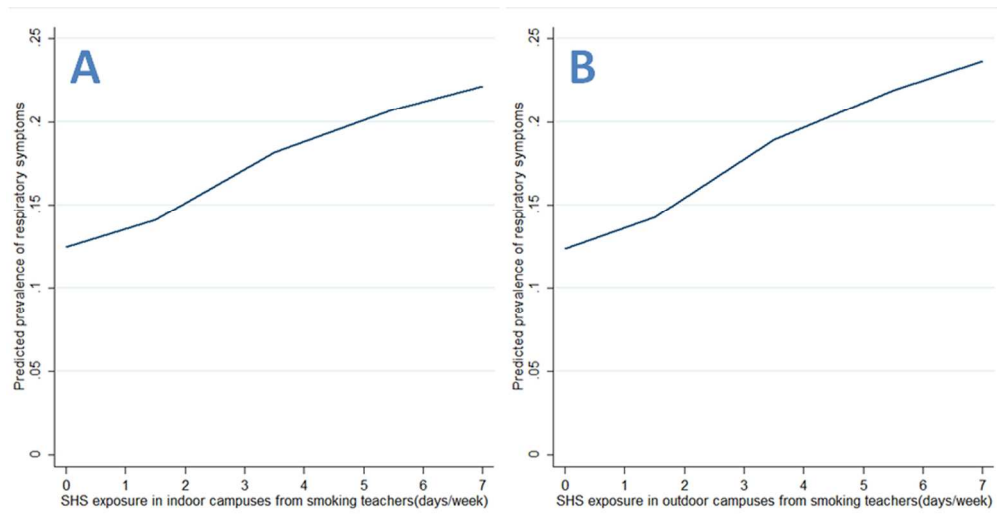

Figure 3. Predicted prevalence of respiratory symptoms based on second-hand smoke exposure from smoking teachers (A: exposure in indoor campuses; B: exposure in outdoor campuses).

124x63mm (300 x 300 DPI)

review only

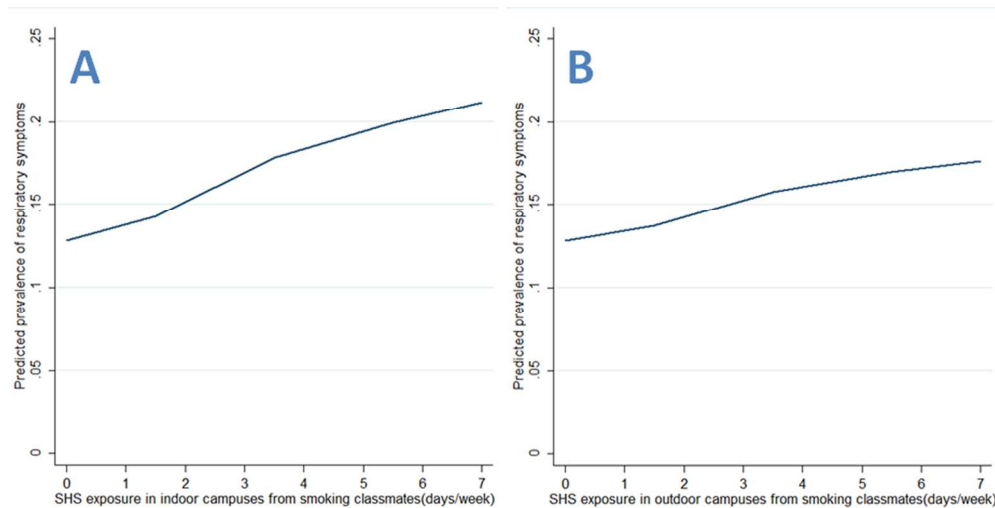

Figure 4. Predicted prevalence of respiratory symptoms based on second-hand smoke exposure from smoking classmates (A: exposure in indoor campuses; B: exposure in outdoor campuses).

124x63mm (300 x 300 DPI)

**STROBE 2007 (v4) Statement—Checklist of items that should be included in reports of *cross-sectional studies***

| Section/Topic                | Item # | Recommendation                                                                                                                                                                       | Reported on page # |
|------------------------------|--------|--------------------------------------------------------------------------------------------------------------------------------------------------------------------------------------|--------------------|
| <b>Title and abstract</b>    | 1      | (a) Indicate the study's design with a commonly used term in the title or the abstract                                                                                               | 2                  |
|                              |        | (b) Provide in the abstract an informative and balanced summary of what was done and what was found                                                                                  | 2                  |
| <b>Introduction</b>          |        |                                                                                                                                                                                      |                    |
| Background/rationale         | 2      | Explain the scientific background and rationale for the investigation being reported                                                                                                 | 4-5                |
| Objectives                   | 3      | State specific objectives, including any prespecified hypotheses                                                                                                                     | 5                  |
| <b>Methods</b>               |        |                                                                                                                                                                                      |                    |
| Study design                 | 4      | Present key elements of study design early in the paper                                                                                                                              | 5                  |
| Setting                      | 5      | Describe the setting, locations, and relevant dates, including periods of recruitment, exposure, follow-up, and data collection                                                      | 5                  |
| Participants                 | 6      | (a) Give the eligibility criteria, and the sources and methods of selection of participants                                                                                          | 5                  |
| Variables                    | 7      | Clearly define all outcomes, exposures, predictors, potential confounders, and effect modifiers. Give diagnostic criteria, if applicable                                             | 6-7                |
| Data sources/<br>measurement | 8*     | For each variable of interest, give sources of data and details of methods of assessment (measurement). Describe comparability of assessment methods if there is more than one group | 6-7                |
| Bias                         | 9      | Describe any efforts to address potential sources of bias                                                                                                                            | 6-7                |
| Study size                   | 10     | Explain how the study size was arrived at                                                                                                                                            | 5-6                |
| Quantitative variables       | 11     | Explain how quantitative variables were handled in the analyses. If applicable, describe which groupings were chosen and why                                                         | 6-7                |
| Statistical methods          | 12     | (a) Describe all statistical methods, including those used to control for confounding                                                                                                | 7                  |
|                              |        | (b) Describe any methods used to examine subgroups and interactions                                                                                                                  | 7                  |
|                              |        | (c) Explain how missing data were addressed                                                                                                                                          | No missing data    |
|                              |        | (d) If applicable, describe analytical methods taking account of sampling strategy                                                                                                   | No applicable      |
|                              |        | (e) Describe any sensitivity analyses                                                                                                                                                | 7                  |
| <b>Results</b>               |        |                                                                                                                                                                                      |                    |

|                          |     |                                                                                                                                                                                                              |               |
|--------------------------|-----|--------------------------------------------------------------------------------------------------------------------------------------------------------------------------------------------------------------|---------------|
| Participants             | 13* | (a) Report numbers of individuals at each stage of study—eg numbers potentially eligible, examined for eligibility, confirmed eligible, included in the study, completing follow-up, and analysed            | 8             |
|                          |     | (b) Give reasons for non-participation at each stage                                                                                                                                                         | 8             |
|                          |     | (c) Consider use of a flow diagram                                                                                                                                                                           | No applicable |
| Descriptive data         | 14* | (a) Give characteristics of study participants (eg demographic, clinical, social) and information on exposures and potential confounders                                                                     | 8             |
|                          |     | (b) Indicate number of participants with missing data for each variable of interest                                                                                                                          | 8             |
| Outcome data             | 15* | Report numbers of outcome events or summary measures                                                                                                                                                         | 8             |
| Main results             | 16  | (a) Give unadjusted estimates and, if applicable, confounder-adjusted estimates and their precision (eg, 95% confidence interval). Make clear which confounders were adjusted for and why they were included | 8-10          |
|                          |     | (b) Report category boundaries when continuous variables were categorized                                                                                                                                    | 8-10          |
|                          |     | (c) If relevant, consider translating estimates of relative risk into absolute risk for a meaningful time period                                                                                             | No applicable |
| Other analyses           | 17  | Report other analyses done—eg analyses of subgroups and interactions, and sensitivity analyses                                                                                                               | No applicable |
| <b>Discussion</b>        |     |                                                                                                                                                                                                              |               |
| Key results              | 18  | Summarise key results with reference to study objectives                                                                                                                                                     | 10            |
| Limitations              | 19  | Discuss limitations of the study, taking into account sources of potential bias or imprecision. Discuss both direction and magnitude of any potential bias                                                   | 13-14         |
| Interpretation           | 20  | Give a cautious overall interpretation of results considering objectives, limitations, multiplicity of analyses, results from similar studies, and other relevant evidence                                   | 14            |
| Generalisability         | 21  | Discuss the generalisability (external validity) of the study results                                                                                                                                        | 13            |
| <b>Other information</b> |     |                                                                                                                                                                                                              |               |
| Funding                  | 22  | Give the source of funding and the role of the funders for the present study and, if applicable, for the original study on which the present article is based                                                | No funding    |

\*Give information separately for cases and controls in case-control studies and, if applicable, for exposed and unexposed groups in cohort and cross-sectional studies.

**Note:** An Explanation and Elaboration article discusses each checklist item and gives methodological background and published examples of transparent reporting. The STROBE checklist is best used in conjunction with this article (freely available on the Web sites of PLoS Medicine at <http://www.plosmedicine.org/>, Annals of Internal Medicine at <http://www.annals.org/>, and Epidemiology at <http://www.epidem.com/>). Information on the STROBE Initiative is available at [www.strobe-statement.org](http://www.strobe-statement.org).

# BMJ Open

## Frequency-risk relationships between second-hand smoke exposure and respiratory symptoms among adolescents: a cross-sectional study in South China

|                                 |                                                                                                                                                                                                                                                                                                                                                                                                                                                                                            |
|---------------------------------|--------------------------------------------------------------------------------------------------------------------------------------------------------------------------------------------------------------------------------------------------------------------------------------------------------------------------------------------------------------------------------------------------------------------------------------------------------------------------------------------|
| Journal:                        | <i>BMJ Open</i>                                                                                                                                                                                                                                                                                                                                                                                                                                                                            |
| Manuscript ID                   | bmjopen-2017-019875.R1                                                                                                                                                                                                                                                                                                                                                                                                                                                                     |
| Article Type:                   | Research                                                                                                                                                                                                                                                                                                                                                                                                                                                                                   |
| Date Submitted by the Author:   | 12-Dec-2017                                                                                                                                                                                                                                                                                                                                                                                                                                                                                |
| Complete List of Authors:       | Chen, Zhiyao; Guangdong Pharmaceutical University<br>Liu, Guocong; Guangzhou Yuexiu Center for Disease Control and Prevention<br>Li, Shunming; Guangdong Pharmaceutical University<br>Jiang, Ting; Guangzhou Yuexiu Center for Disease Control and Prevention<br>Xu, Bin; Guangzhou Yuexiu Center for Disease Control and Prevention<br>Chen, Jianying; Guangzhou Yuexiu District for Community Health Service Center of Baiyun Street<br>Ye, Xiaohua; Guangdong Pharmaceutical University |
| <b>Primary Subject Heading</b>: | Smoking and tobacco                                                                                                                                                                                                                                                                                                                                                                                                                                                                        |
| Secondary Subject Heading:      | Epidemiology, Public health, Respiratory medicine, Smoking and tobacco                                                                                                                                                                                                                                                                                                                                                                                                                     |
| Keywords:                       | second-hand smoke exposure, respiratory symptoms, adolescents                                                                                                                                                                                                                                                                                                                                                                                                                              |
|                                 |                                                                                                                                                                                                                                                                                                                                                                                                                                                                                            |

SCHOLARONE™  
Manuscripts

only

1  
2  
3  
4 **1 Frequency-risk relationships between second-hand smoke exposure and**  
5  
6 **2 respiratory symptoms among adolescents: a cross-sectional study in South China**  
7

8  
9 3 Zhiyao Chen MPH <sup>1,#</sup>, Guocong Liu MPH <sup>2,#</sup>, Shunming Li MPH <sup>1</sup>, Ting Jiang BS <sup>2</sup>, Bin Xu MPH <sup>2</sup>,  
10  
11 4 Jianying Chen BS <sup>3,#</sup>, Xiaohua Ye PhD <sup>1,\*</sup>

12  
13 <sup>1</sup> School of Public Health, Guangdong Pharmaceutical University, Guangzhou, China.

14  
15 <sup>2</sup>Health Education Section, Guangzhou Yuexiu Center for Disease Control and Prevention,  
16  
17 Guangzhou, China.

18  
19 <sup>3</sup>General Department, Guangzhou Yuexiu District for Community Health Service Center of  
20  
21 Baiyun Street, Guangzhou, China

22  
23  
24  
25  
26  
27  
28  
29  
30  
31  
32  
33  
34  
35  
36  
37  
38  
39  
40  
41  
42  
43  
44  
45  
46  
47  
48  
49  
50  
51  
52  
53  
54  
55  
56  
57  
58  
59  
60

11 **\*Correspondence to:** Dr Xiaohua Ye, smalltomato@163.com.

13 <sup>#</sup> These authors contributed equally to this work.

15 **Word counts** of the manuscript (excluding references): 2587



1  
2  
3 20 **ABSTRACT**

4 21 **Objectives:** Although previous studies have suggested an association between second-hand smoke  
5  
6  
7 22 (SHS) exposure and respiratory symptoms, current evidence is inconsistent. Additionally, it  
8  
9  
10 23 remains unclear whether there are frequency-risk relationships between SHS exposure and  
11  
12 24 respiratory symptoms among adolescents.

13  
14 25 **Methods:** A cross-sectional survey was conducted using a stratified cluster sampling method to  
15  
16  
17 26 obtain a representative sample of high school students in Guangzhou, China. The respiratory  
18  
19 27 symptoms were defined as persistent cough or sputum for 3 consecutive months during the past 12  
20  
21 28 months. Self-reported SHS exposure was defined as non-smokers' inhalation of the smoke exhaled  
22  
23 29 from smokers on  $\geq 1$  day a week in the past 7 days. The univariable and multivariable logistic  
24  
25 30 regression models were fitted to explore the potential frequency-risk relationships between SHS  
26  
27 31 exposure and respiratory symptoms.

28  
29 32 **Results:** Among 3575 students, the overall prevalence of SHS exposure was 69.2%, including  
30  
31 33 49.5% in public places, 34.5% in homes, 22.7% in indoor campuses, and 29.2% in outdoor  
32  
33 34 campuses. There were significantly increased risks of having respiratory symptoms corresponding  
34  
35 35 to SHS exposure in public places (odds ratio [OR]=1.60, 95% CI 1.30-1.95), in homes (OR=1.53,  
36  
37 36 95% CI 1.25-1.87), in indoor campuses (OR = 1.43, 95% CI 1.14-1.79) and in outdoor campuses  
38  
39 37 (OR = 1.37, 95% CI 1.10-1.69) using no exposure as reference. Notably, we observed  
40  
41 38 monotonically frequency-risk relationships between setting-specific (e.g., homes, public places,  
42  
43 39 and campuses) SHS exposure and respiratory symptoms.

44  
45 40 **Conclusion:** Our findings suggest that setting-specific SHS exposure is associated with a  
46  
47 41 significant, dose-dependent increase in risk of respiratory symptoms.  
48  
49  
50

51  
52  
53  
54  
55  
56 42

1  
2  
3  
4 43 **Strengths and limitations of this study**  
5

6 44 ■ This study contributes additionally to the literature by exploring the potential frequency-risk  
7  
8 45 relationship between SHS exposure and respiratory symptoms.

9  
10  
11 46 ■ This study differentiates SHS exposure in specific settings and specific sources to make  
12  
13 47 exposure and potential relations clearer.

14  
15 48 ■ SHS exposure and respiratory symptoms were self-reported, which is a limitation.

16  
17  
18 49 ■ Cross-sectional studies do not establish causal relationships but only depict associations. Our  
19  
20 50 findings highlight the need for further longitudinal studies to establish the causal relationship  
21  
22 51 and its biological mechanisms.  
23  
24

25 52  
26  
27  
28  
29  
30  
31  
32  
33  
34  
35  
36  
37  
38  
39  
40  
41  
42  
43  
44  
45  
46  
47  
48  
49  
50  
51  
52  
53  
54  
55  
56  
57  
58  
59  
60

## 53 INTRODUCTION

54 It is well established that inhaling second-hand smoke (SHS) is harmful and that no  
55 scientific evidence establishes a risk-free level of exposure.<sup>1,2</sup> Notably, a retrospective  
56 analysis of data from 192 countries revealed that 40% of children (including 35% of  
57 non-smoking women and 33% of non-smoking men) were exposed to SHS, and this  
58 exposure is estimated to result in an annual estimate of 603000 deaths attributable to  
59 SHS.<sup>3</sup> Global youth tobacco surveillance also reported that nearly half the adolescents  
60 worldwide were exposed to SHS at home (42.5%) and in public places (55.1%),  
61 which constitutes a substantial public health threat and demands urgent intervention.<sup>4</sup>  
62 China is the world's largest producer and consumer of tobacco. The 2010 Global  
63 Adult Tobacco Survey reported and 2014 Chinese adolescents Tobacco Survey  
64 reported that 72.4% adult and 72.9% adolescents in China were exposed to SHS,  
65 suggesting that the tremendous burden from tobacco-induced diseases makes tobacco  
66 prevention an essential health priority in China.<sup>5,6</sup> In recent years, much attention has  
67 been focused on SHS exposure in public places and in homes, but there is limited  
68 reports on SHS exposure in indoor and outdoor campuses among adolescents.

69 Epidemiological studies of adolescents have explored the relations between SHS  
70 exposure and respiratory symptoms (such as nose irritation, coughing, and sore throat)  
71 or infection,<sup>7-11</sup> but current evidence is inconsistent. Some studies demonstrated  
72 significantly positive associations,<sup>12,13</sup> while the report from Malaysia revealed no  
73 association.<sup>14</sup> Recent Chinese studies indicated that there was a positive relation  
74 between household SHS exposure and respiratory symptoms in adolescents, but the

1  
2  
3  
4 75 relation for SHS exposure in public places or in schools was unknown.<sup>15,16</sup> SHS  
5  
6 76 exposure occurs in varying amounts in public places, homes, and other indoor spaces,  
7  
8 77 but few studies have differentiated SHS exposure in indoor and outdoor to make the  
9  
10 78 setting-specific relations between SHS exposure and respiratory symptoms clearer. Of  
11  
12 79 particular concern is that little is known about the effects of campus SHS exposure on  
13  
14 80 respiratory symptoms. Furthermore, it was unclear whether there are dose-response  
15  
16 81 relationships between SHS exposure and respiratory symptoms. This study builds on  
17  
18 82 previous literature to explore setting-specific (e.g., public places, homes, and  
19  
20 83 campuses) and frequency-risk relationships between SHS exposure and respiratory  
21  
22 84 symptoms among adolescents.  
23  
24  
25  
26  
27  
28  
29

## 30 **METHODS**

### 31 **Ethics statement**

32  
33  
34 35 The study was approved by the Ethics Committee of Guangdong Pharmaceutical  
36  
37 38 University, and it was performed in accordance with the approved guidelines. The  
39  
40 41 goals of the study were given to study participants and they should express their  
42  
43 44 willingness to participate. Before participating, written informed consents were  
45  
46 47 obtained from their parents or guardians.  
48  
49

### 50 **Study design and data collection**

51  
52 53 This cross-sectional study was conducted in Guangzhou, China, from March to April  
54  
55 56 2016. The target population was high school students. A stratified cluster sampling  
57  
58  
59  
60

1  
2  
3  
4 97 process was used to obtain a representative sample. Notably, middle schools in most  
5  
6 98 part of China are generally rated by the Bureau of Education as key schools (or  
7  
8 99 prestigious schools) and ordinary schools (or non-prestigious schools) according to  
9  
10  
11 100 level of education and the education quality. In the first stage, all high schools were  
12  
13 101 divided into two categories (prestigious or non-prestigious schools). Three high  
14  
15 102 schools were randomly sampled from prestigious schools, and four high schools were  
16  
17 103 randomly sampled from non-prestigious schools, with the probability of selection  
18  
19 104 proportional to the number of the schools. In the second stage, classes in the selected  
20  
21 105 schools were randomly sampled with proportional to school enrollment size, and all  
22  
23 106 students in sampled classes were eligible to participate.  
24  
25  
26  
27

28 107 All interviewers in each school were centrally trained to ensure that the survey  
29  
30 108 was carried out according to the protocol and operation procedures were identical  
31  
32 109 across all areas. After obtaining informed consent, eligible students were asked to  
33  
34 110 complete a face-to-face survey by trained interviewers. A total of 3833 participants  
35  
36 111 were enrolled in the study, and the effective response rate was 95.4% (3657/3833).  
37  
38 112 Only non-smokers were included in the analyses and a total of 3575 non-smokers  
39  
40 113 were included in this study.  
41  
42  
43  
44

45 114

#### 46 115 **Study variables**

47  
48 116 The main outcome variable was self-reported respiratory symptoms. The respiratory  
49  
50 117 symptoms were defined as persistent cough or sputum for 3 consecutive months  
51  
52 118 during the past 12 months.<sup>17-19</sup> The main independent variable of respiratory  
53  
54  
55  
56  
57

1  
2  
3  
4 119 symptoms was self-reported SHS exposure, which was defined as non-smokers'  
5  
6 120 inhalation of the smoke exhaled from smokers on  $\geq 1$  day a week in the past 7 days for  
7  
8 121 at least 6 months (first question: "In the past 7 days, how many days did you breathe  
9  
10 122 in SHS in homes (or indoor public places, indoor campuses, outdoor campuses)");  
11  
12 123 second question for those having SHS exposure: "Did you breathe in SHS in this  
13  
14 124 venue for at least 6 months?"). In order to recall SHS exposure for at least 6 months,  
15  
16 125 we use both curriculum schedules and calendars as an assistive device to facilitate  
17  
18 126 recall the time. Frequency of SHS exposure was continuous data (days/week), and  
19  
20 127 was also categorized into three groups:  $< 1$  day/week (no exposure), '1-4 days/week'  
21  
22 128 and '5-7 days/week'. Smoking status was classified as non-smokers and smokers  
23  
24 129 (defined as 'has smoked over 100 cigarettes in their lifetime').  
25  
26  
27  
28  
29

30  
31 130 Covariates including potential mediators and confounders were chosen a priori  
32  
33 131 on the basis of literature review. Potential covariates in our study included age (year),  
34  
35 132 gender (male or female), grade (4-5 or 1-2), only-child (yes or no), monthly pocket  
36  
37 133 money ( $< ¥100$ ,  $¥100-399$ , or  $\geq ¥400$ ), prestigious school (yes or no), father's  
38  
39 134 education (primary school, middle school, or university and above), mother's  
40  
41 135 education (primary school, middle school, or university and above), and asthma  
42  
43 136 history (yes or no).  
44  
45  
46  
47  
48  
49

### 50 138 **Data analysis**

51  
52 139 All data were entered in duplicate into EpiData version 3.1 database (The EpiData  
53  
54 140 Association, Odense Denmark). The univariable and multivariable logistic regression  
55  
56  
57  
58  
59  
60

1  
2  
3  
4 141 models were fitted to calculate the odds ratios (ORs) and 95% confidence intervals  
5  
6 142 (CIs) for evaluating the frequency-risk relationships between SHS exposure  
7  
8 143 (including ordinal and continuous variables) and respiratory symptoms. Linear trends  
9  
10  
11 144 of SHS exposure were assessed by modeling exposure as continuous variables  
12  
13 145 (arithmetic or logarithmic scale) or ordinal variables in multivariable models.  
14  
15  
16 146 Two-sided p-value of <0.05 was regarded as being of statistical significance. All  
17  
18 147 statistical analyses were conducted using Stata version 14.0(StataCorp LP, College  
19  
20  
21 148 Station, Texas, USA).

22  
23 149

## 24 25 150 **RESULTS**

### 26 27 151 **Characteristics of the sample**

28  
29  
30 152 A total of 3575 non-smoking students were interviewed, of whom 477 (13.3%) were  
31  
32 153 classified as having respiratory symptoms. Participants' mean age was  $15.0 \pm 1.8$   
33  
34 154 years, and 50.9% were male students. About 62.2% of the students were the only child  
35  
36 155 in their family and 63.4% from prestigious schools. The overall prevalence of SHS  
37  
38 156 exposure was 69.2%, including 49.5% in indoor public places, 34.5% in homes,  
39  
40 157 22.7% in indoor campuses, and 29.2% in outdoor campuses (Table 1).

41  
42  
43  
44  
45 158

### 46 47 159 **Relation between binary SHS exposure and respiratory symptoms**

48  
49  
50 160 The prevalence of respiratory symptoms was significantly higher in students with  
51  
52 161 SHS exposure (OR=1.72, 95% CI 1.35-2.17, for SHS in general; OR=1.60, 95% CI  
53  
54 162 1.30-1.95, for SHS in indoor public places; OR=1.53, 95% CI 1.25-1.87, for SHS in

1  
2  
3  
4 163 homes; OR = 1.43, 95% CI 1.14-1.79, for SHS in indoor campuses) than in those with  
5  
6 164 no exposure (Table 2). Similar positive associations were observed in students with  
7  
8 165 SHS exposure in indoor campuses from smoking teachers (OR =1.34, 95% CI  
9  
10 166 1.05-1.71) or from smoking classmates (OR = 1.54, 95% CI 1.15-2.06). Notably, the  
11  
12 167 effects of SHS exposure in outdoor campuses cannot be ignored. Students with SHS  
13  
14 168 exposure in outdoor campuses had significantly higher rates of respiratory symptoms  
15  
16 169 (OR = 1.37, 95% CI 1.10-1.69) as compared with unexposed students, and there were  
17  
18 170 similar positive associations between respiratory symptoms and SHS exposure in  
19  
20 171 outdoor campuses from smoking teachers (OR =1.38, 95% CI 1.09-1.75) or from  
21  
22 172 smoking classmates (OR = 1.33, 95% CI 1.03-1.71).

23  
24  
25  
26  
27  
28 173

#### 29 30 174 **Relation between ordinal SHS exposure and respiratory symptoms**

31  
32 175 Compared with no SHS exposure, ordinal frequency of SHS exposure was associated  
33  
34 176 with respiratory symptoms in an increasing manner (SHS in public places: OR=1 for  
35  
36 177 no exposure, OR=1.50 for 1-4 days/week, OR=1.87 for 5-7 days/week, *p* for linear  
37  
38 178 trend <0.001; SHS in indoor campuses: OR=1 for no exposure, OR=1.24 for 1-4  
39  
40 179 days/week, OR=1.84 for 5-7 days/week, *p* for linear trend <0.001; Table 3). When  
41  
42 180 examining these relations by source of exposure, significant increasing trends were  
43  
44 181 observed for SHS exposure in indoor campuses from smoking teachers (*p* for linear  
45  
46 182 trend =0.001) and from smoking classmates (*p* for linear trend =0.005). Additionally,  
47  
48 183 there was a significantly increasing relation between ordinal frequency of SHS  
49  
50 184 exposure in outdoor campuses and respiratory symptoms (OR=1 for no exposure,  
51  
52  
53  
54  
55  
56  
57  
58  
59  
60



1  
2  
3  
4 185 OR=1.28 for 1-4 days/week, OR=1.56 for 5-7 days/week,  $p$  for linear trend =0.007;  
5  
6 186 [Table 3](#)), and similar increasing trends were observed for SHS exposure in outdoor  
7  
8 187 campuses from smoking teachers ( $p$  for linear trend =0.004) and from smoking  
9  
10 188 classmates ( $p$  for linear trend =0.006). However, no increasing trend was observed for  
11  
12  
13 189 SHS exposure in homes.  
14  
15  
16  
17

### 18 191 **Relation between continuous SHS exposure and respiratory symptoms**

19 192 As to continuous SHS exposure, there were significant frequency-risk relationships  
20  
21 193 between indoor SHS exposure and respiratory symptoms (OR = 2.30, 95% CI:  
22  
23 194 1.67-3.16, for SHS in indoor public places; OR = 1.64, 95% CI: 1.23-2.20, for SHS in  
24  
25 195 homes; OR = 2.09, 95% CI: 1.42-3.07, for SHS in indoor campuses; OR = 1.70, 95%  
26  
27 196 CI: 1.18-2.47, for SHS in outdoor campuses; [Table 3](#)). When examining these  
28  
29 197 relations by source of exposure, there were similar frequency-risk relationships for  
30  
31 198 SHS exposure in indoor or outdoor campuses ([Table 3](#)). Additionally, we observed a  
32  
33 199 monotonically increasing frequency-risk trend for SHS exposure in indoor public  
34  
35 200 places ([Figure 1A](#)), in homes ([Figure 1B](#)), in indoor campuses ([Figure 2A](#)) or in  
36  
37 201 outdoor campuses ([Figure 2B](#)). When examining these trends by source of exposure,  
38  
39 202 there were similar increasing frequency-risk trends for SHS exposure from smoking  
40  
41 203 teachers ([Figure 3A](#) for indoor SHS and [Figure 3B](#) for outdoor SHS) and from  
42  
43 204 smoking classmates ([Figure 4A](#) for indoor SHS and [Figure 4B](#) for outdoor SHS).  
44  
45  
46  
47  
48  
49  
50  
51  
52  
53  
54

### 55 206 **DISCUSSION**

1  
2  
3  
4 207 This observational study showed that non-smoking students with setting-specific  
5  
6 208 SHS exposure experienced significantly higher risks of respiratory symptoms than  
7  
8 209 those with no exposure. The most striking findings from this study were that there  
9  
10  
11 210 were monotonically increasing frequency-risk relationships between setting-specific  
12  
13 211 SHS exposure and respiratory symptoms. When examining these relations by source  
14  
15  
16 212 of exposure, there were similar monotonically increasing frequency-risk relationships  
17  
18 213 for SHS exposure from smoking teachers and from smoking classmates.

19  
20  
21 214 It is well known that there is no risk-free level of exposure to SHS. Although  
22  
23 215 previous studies have focused on SHS exposure among Chinese adolescents,<sup>15,16,20</sup>  
24  
25 216 there is limited reports regarding SHS exposure in specific settings and specific  
26  
27  
28 217 sources to make exposure clearer. According to the partial smoke-free legislation  
29  
30  
31 218 implemented in Guangzhou on 1 September 2010, full smoke-free ban covered indoor  
32  
33 219 campuses, outdoor campuses and most indoor public places, but did not cover homes.  
34  
35 220 It is disappointing that SHS exposure in schools was not eliminated, and was still at a  
36  
37  
38 221 high level (22.7% for SHS exposure in indoor campuses; 29.2% for SHS exposure in  
39  
40  
41 222 outdoor campuses). This observation may be due to poor compliance with the full  
42  
43 223 smoke-free ban in campuses, since we observed that SHS exposure among students  
44  
45 224 was mainly from smoking teachers and smoking classmates in both indoor and  
46  
47  
48 225 outdoor campuses. Similarly, a recent population-based study in Tehran showed that  
49  
50  
51 226 about 30% non-smoking students have been exposed to SHS from smoking teachers  
52  
53 227 in indoor or outdoor campuses,<sup>21</sup> and another survey of Chinese college students  
54  
55 228 reported that 37% of non-smokers had SHS exposure from smoking teachers.<sup>20</sup> More

1  
2  
3  
4 229 disappointing was that SHS exposure in indoor public places among students was  
5  
6 230 remarkably high in 49.5% in this study, which is similar to the latest study on adult  
7  
8 231 SHS exposure in Guangzhou (50.3%) and the Global Youth Tobacco Survey  
9  
10 232 (47.8%).<sup>22,23</sup> After the implementation of a smoke-free legislation, very few  
11  
12  
13 233 respondents (1-2%) reported smoking in public places in England,<sup>24</sup> but smoking  
14  
15 234 behaviors still remained high in public places in Guangzhou because of unwillingness  
16  
17  
18 235 of the policymakers to implement tougher smoke-free policies and poor compliance  
19  
20 236 with the smoke-free law among smokers.<sup>23</sup> These findings reveal that a partial  
21  
22  
23 237 smoke-free legislation has a weak impact on smoking cessation, but a comprehensive  
24  
25 238 smoke-free legislation can substantially attenuate smoking behaviors, which point out  
26  
27  
28 239 the urgent need for a comprehensive smoke-free legislation covering all public places  
29  
30 240 in Guangzhou to protect the public from SHS hazards.

31  
32  
33 241 A few published studies have indicated that SHS exposure may be a risk factor of  
34  
35 242 respiratory symptoms, but the potential relation for setting-specific exposure was still  
36  
37 243 unclear.<sup>15,16,25,26</sup> Recent studies of Chinese adolescents indicated that there was a  
38  
39  
40 244 positive relation between household SHS exposure and respiratory symptoms, but the  
41  
42 245 relation for SHS exposure in public places or in schools was unknown.<sup>15,16</sup> In addition,  
43  
44  
45 246 the surveys of London casino workers and Shanghai workers revealed that there was  
46  
47 247 an association between SHS exposure at work and respiratory symptoms, but the  
48  
49  
50 248 association for SHS exposure in homes or in public places was unknown.<sup>25,26</sup> It is  
51  
52 249 noteworthy that the influence of SHS exposure from indoor campuses on respiratory  
53  
54  
55 250 symptoms is still unclear, and the potential dose-response association between

1  
2  
3  
4 251 frequency of SHS exposure and respiratory symptoms is also uncertain. Our study  
5  
6 252 builds on previous literature by exploring the potential dose-response relationships  
7  
8 253 and differentiating SHS exposure in homes, public places, and campuses to make  
9  
10 254 exposure and potential relations clearer. We found that there were positive relations  
11  
12 255 and frequency-risk relationships between setting-specific SHS exposure and  
13  
14 256 respiratory symptoms. When examining the relations by source of exposure, there was  
15  
16 257 still evidence of similar dose-response relationships for SHS exposure in indoor  
17  
18 258 campuses from smoking teachers and smoking classmates. These findings provided  
19  
20 259 new evidence of dose-response relationships between SHS exposure and respiratory  
21  
22 260 symptoms among adolescents, and support that the future studies should focus more  
23  
24 261 on differentiating these associations in setting-specific and source-specific exposure.  
25  
26 262 Additionally, further research is needed to establish the causal relationship and  
27  
28 263 potential biological mechanisms, and confirm that elimination of SHS exposure (or  
29  
30 264 stricter smoke-free legislation in Guangzhou) will lead to a reduction in respiratory  
31  
32 265 symptoms among adolescents.

33  
34  
35  
36  
37  
38  
39  
40 266 Globally, outdoor smoking restrictions are uncommon, though the  
41  
42 267 outdoor-campus smoking bans implemented in Guangzhou City on 1 September 2010.  
43  
44 268 A few published studies have indicated that smoking increases PM<sub>2.5</sub> concentrations in  
45  
46 269 outdoor areas to levels that are potentially hazardous to health,<sup>27,28</sup> but research  
47  
48 270 linking SHS exposures from outdoor environments to health effects is still rare.  
49  
50 271 Notably, the potential relation between outdoor SHS exposure and respiratory  
51  
52 272 symptoms is still unclear. To our knowledge, this is the first study to reveal the  
53  
54  
55  
56  
57  
58  
59  
60

1  
2  
3  
4 273 relation between SHS exposure in outdoor campuses and respiratory symptoms  
5  
6 274 among adolescents, and found that outdoor SHS exposure was positively associated  
7  
8 275 with respiratory symptoms in a monotonically increasing trend. When examining the  
9  
10 276 relations by source of exposure, there were still similar frequency-risk relationships  
11  
12  
13 277 for SHS exposure in outdoor campuses from smoking teachers and smoking  
14  
15  
16 278 classmates. Although outdoor SHS is more transient than indoor SHS, evidence from  
17  
18 279 review of the research literature on SHS levels in outdoor hospitality venues  
19  
20 280 suggested that tobacco-generated PM<sub>2.5</sub> in outdoor setting may occasionally be  
21  
22  
23 281 equivalent to or higher than levels observed in indoor setting when smoking is  
24  
25 282 permitted at close proximity.<sup>27</sup> These findings provide more evidence for the adverse  
26  
27  
28 283 effects of outdoor SHS exposure on human respiratory symptoms, and also support  
29  
30 284 growing concern about SHS exposure in outdoor campuses. Future studies on school  
31  
32  
33 285 SHS exposure in adolescents and protective measures against SHS should take  
34  
35 286 outdoor campuses SHS into consideration.

36  
37  
38 287 The most meaningful advantage of this study is that we contributes additionally  
39  
40 288 to the literature by exploring the potential frequency-risk relationships and  
41  
42  
43 289 differentiating SHS exposure in specific settings and specific sources to make  
44  
45 290 exposure and potential relations clearer. There are also some potential limitations in  
46  
47  
48 291 this study. First, all data was self-reported, including SHS exposure and respiratory  
49  
50 292 symptoms. For SHS exposure, biochemical measures can give objective  
51  
52 293 measurements, but cannot distinguish the sources of exposure, the key factors in this  
53  
54  
55 294 study. Previous survey has found that school children are capable of reporting their

1  
2  
3  
4 295 health conditions reliably,<sup>29</sup> and the presence of frequent cough and phlegm was quite  
5  
6 296 obvious to avoid measurement error. Second, causal association between SHS  
7  
8 297 exposure and respiratory symptoms could not be ascertained due to the cross-sectional  
9  
10  
11 298 design. However, the notion of reverse causation that students with respiratory  
12  
13 299 symptoms deliberately increased their exposure to noxious SHS seems improbable.  
14  
15  
16 300 The strong association observed in other studies also supported our data validity and  
17  
18 301 provided support for the deduction of causation.<sup>15,30,31</sup> Finally, few people would be  
19  
20  
21 302 completely unexposed to SHS in densely populated Guangzhou even now, when  
22  
23 303 smoking was still allowed in public places (e.g., cafes, bars, night clubs, amusement  
24  
25 304 parks, restaurants, and workplaces). Therefore, the control groups who reported no  
26  
27  
28 305 SHS exposure have probably underestimated their exposure, and the risk for  
29  
30  
31 306 respiratory symptoms in these groups would also be underestimated.

32  
33 307 In conclusion, SHS exposure in indoor and outdoor campuses is still at a high  
34  
35 308 level, which suggests poor compliance with the full smoke-free ban in schools and  
36  
37 309 supports growing concern about SHS exposure in campuses. Additionally, this study  
38  
39  
40 310 contributes to the literature by finding monotonically increasing frequency-risk  
41  
42 311 relationships between SHS exposure and respiratory symptoms among adolescents in  
43  
44  
45 312 addition to differentiating SHS exposure in specific settings and specific sources to  
46  
47 313 make these relationships clearer. Future longitudinal studies are needed to establish  
48  
49  
50 314 the causal relationship and its biological mechanisms.

51  
52 315

53  
54  
55 316 **Contributors**

1  
2  
3  
4 317 CZ, LG, LS, JT, XB, CJ and YX were involved in the design of the study, data  
5  
6 318 analysis and writing of the draft of the manuscript. All the authors read and approved  
7  
8 319 the final version of the manuscript.  
9

10  
11 320

12  
13 321 **Funding**

14  
15 322 The authors bore their own costs for conducting this study and hence no specific  
16  
17 323 funding line for this study.  
18  
19

20  
21 324

22  
23 325 **Competing interests None.**

24  
25 326

26  
27 327 **Ethics approval**

28  
29 328 The Ethics Committee of Guangdong Pharmaceutical University.  
30  
31

32  
33 329

34  
35 330 **Data sharing statement**

36  
37 331 No additional data are available.  
38  
39  
40  
41  
42  
43  
44  
45  
46  
47  
48  
49  
50  
51  
52  
53  
54  
55  
56  
57  
58  
59  
60

332 **References**

- 333 1. Makadia LD, Roper PJ, Andrews JO, Tingen MS. Tobacco Use and Smoke Exposure in Children:  
334 New Trends, Harm, and Strategies to Improve Health Outcomes. *Curr Allergy Asthma Rep.*  
335 2017;17(8):55.
- 336 2. Office on S, Health. Publications and Reports of the Surgeon General. *The Health Consequences*  
337 *of Involuntary Exposure to Tobacco Smoke: A Report of the Surgeon General.* Atlanta (GA):  
338 Centers for Disease Control and Prevention (US); 2006.
- 339 3. Oberg M, Jaakkola MS, Woodward A, Peruga A, Pruss-Ustun A. Worldwide burden of disease  
340 from exposure to second-hand smoke: a retrospective analysis of data from 192 countries. *Lancet.*  
341 2011;377(9760):139-146.
- 342 4. Warren CW, Jones NR, Peruga A, et al. Global youth tobacco surveillance, 2000-2007. *MMWR*  
343 *Surveill Summ.* 2008;57(1):1-28.
- 344 5. Li Q, Xiao L, Zhao L, et al. Global Adult Tobacco Survey (GATS) China 2010 Country Report.  
345 Available online: <http://www.notc.org.cn/newjcpj/201304/W020121108628365808856.pdf>. 2010.
- 346 6. Chinese Center for Disease Control and Prevention. Report on tobacco use in Chinese adolescents  
347 (2014). *China: Beijing, Tobacco Control Office.* 2014. Available online:  
348 <https://wenku.baidu.com/view/b6883a9450e2524de5187ee0.html>.
- 349 7. Hisam A, Rahman MU, Kadir E, Azam N, Masood S. Proportion of exposure of passive smoking  
350 in teenage group and symptoms precipitated after exposure to second hand smoke. *J Coll*  
351 *Physicians Surg Pak.* 2014;24(6):446-448.
- 352 8. Schick SF, van den Vossenberg G, Luo A, et al. Thirty minute-exposure to aged cigarette smoke  
353 increases nasal congestion in nonsmokers. *J Toxicol Environ Health A.* 2013;76(10):601-613.
- 354 9. Kabir Z, Manning PJ, Holohan J, Keogan S, Goodman PG, Clancy L. Second-hand smoke  
355 exposure in cars and respiratory health effects in children. *Eur Respir J.* 2009;34(3):629-633.
- 356 10. Clark BR, Burkett SA, Andridge RR, Buckley TJ. Evidence of high rates of undiagnosed asthma  
357 in central Ohio elementary schoolchildren. *J Sch Health.* 2013;83(12):896-906.
- 358 11. Jones LL, Hashim A, McKeever T, Cook DG, Britton J, Leonardi-Bee J. Parental and household  
359 smoking and the increased risk of bronchitis, bronchiolitis and other lower respiratory infections  
360 in infancy: systematic review and meta-analysis. *Respir Res.* 2011;12:5.
- 361 12. Jang AS, Choi IS, Lee S, et al. The effect of passive smoking on asthma symptoms, atopy, and  
362 airway hyperresponsiveness in schoolchildren. *J Korean Med Sci.* 2004;19(2):214-217.
- 363 13. Bakoula CG, Kafritsa YJ, Kavadias GD, et al. Objective passive-smoking indicators and  
364 respiratory morbidity in young children. *Lancet.* 1995;346(8970):280-281.
- 365 14. Zulkifli A, Abidin NZ, Abidin EZ, et al. Burden of household smoking habits on the occurrence of  
366 respiratory symptoms among Malaysian adolescents. *Iranian Journal of Public Health.*  
367 2014;43(3):42-52.
- 368 15. Leung LT, Ho SY, Wang MP, Lo WS, Lam TH. Exposure to secondhand smoke from neighbours  
369 and respiratory symptoms in never-smoking adolescents in Hong Kong: a cross-sectional study.  
370 *BMJ Open.* 2015;5(11):e008607.
- 371 16. He QQ, Wong TW, Du L, et al. Environmental tobacco smoke exposure and Chinese  
372 schoolchildren's respiratory health: a prospective cohort study. *Am J Prev Med.*  
373 2011;41(5):487-493.
- 374 17. Peters J, Hedley AJ, Wong CM, et al. Effects of an ambient air pollution intervention and



- 1  
2  
3 375 environmental tobacco smoke on children's respiratory health in Hong Kong. *Int J Epidemiol.*  
4 376 1996;25(4):821-828.
- 5 377 18. Cotes JE, Chinn DJ. MRC questionnaire (MRCQ) on respiratory symptoms. *Occupational*  
6 378 *Medicine.* 2007;57(5):388-388.
- 7  
8 379 19. Ho SY, Wang MP, Lo WS, et al. Comprehensive smoke-free legislation and displacement of  
9 380 smoking into the homes of young children in Hong Kong. *Tob Control.* 2010;19(2):129-133.
- 10 381 20. Gong M, Liang ZY, Zhang YY, Shadel WG, Zhou L, Xiao J. Implementation of the Tobacco-Free  
11 382 Campus Policy on College Campuses: Evidence From a Survey of College Students in Beijing.  
12 383 *Nicotine Tob Res.* 2016;18(11):2083-2091.
- 13  
14 384 21. Emami H, Naserikouzehgarani G, Saeedfar K, Shiraz AR. The Correlation of Student's Smoking  
15 385 and Their Perceived Exposure to Their Teacher's Smoking in Tehran: A Population Based Study.  
16 386 *Journal of Shahid Sadoughi University of Medical Sciences.* 2010;18(2):98-110.
- 17 387 22. Centers for Disease Control and Prevention (CDC). Exposure to secondhand smoke among  
18 388 students aged 13-15 years--worldwide, 2000-2007. *MMWR Morb Mortal Wkly Rep.*  
19 389 2007;56(20):497-500.
- 20 390 23. Ye X, Yao Z, Gao Y, et al. Second-hand smoke exposure in different types of venues: before and  
21 391 after the implementation of smoke-free legislation in Guangzhou, China. *BMJ Open.*  
22 392 2014;4(2):e004273.
- 23  
24 393 24. Lee JT, Glantz SA, Millett C. Effect of smoke-free legislation on adult smoking behaviour in  
25 394 England in the 18 months following implementation. *PLoS One.* 2011;6(6):e20933.
- 26 395 25. Pilkington PA, Gray S, Gilmore AB. Health impacts of exposure to second hand smoke (SHS)  
27 396 amongst a highly exposed workforce: survey of London casino workers. *BMC Public Health.*  
28 397 2007;7:257.
- 29 398 26. Zheng P, Li W, Chapman S, Zhang Z, Gao J, Fu H. Workplace exposure to secondhand smoke and  
30 399 its association with respiratory symptoms--a cross-sectional study among workers in Shanghai.  
31 400 *Tob Control.* 2011;20(1):58-63.
- 32 401 27. Licht AS, Hyland A, Travers MJ, Chapman S. Secondhand smoke exposure levels in outdoor  
33 402 hospitality venues: a qualitative and quantitative review of the research literature. *Tob Control.*  
34 403 2013;22(3):172-179.
- 35 404 28. Stafford J, Daube M, Franklin P. Second hand smoke in alfresco areas. *Health Promot J Austr.*  
36 405 2010;21(2):99-105.
- 37 406 29. Riley AW. Evidence that school-age children can self-report on their health. *Ambul Pediatr.*  
38 407 2004;4(4 Suppl):371-376.
- 39 408 30. Lai HK, Ho SY, Wang MP, Lam TH. Secondhand smoke and respiratory symptoms among  
40 409 adolescent current smokers. *Pediatrics.* 2009;124(5):1306-1310.
- 41 410 31. Lam TH, Chung SF, Betson CL, Wong CM, Hedley AJ. Respiratory symptoms due to active and  
42 411 passive smoking in junior secondary school students in Hong Kong. *Int J Epidemiol.*  
43 412 1998;27(1):41-48.
- 44  
45  
46  
47  
48  
49  
50 413

1  
2  
3  
4 414 **Figure Legends**

5  
6 415 **Figure 1.** Predicted prevalence of respiratory symptoms based on second-hand smoke  
7  
8 416 exposure (A: exposure in indoor public places; B: exposure in homes).

9  
10  
11 417  
12  
13 418 **Figure 2.** Predicted prevalence of respiratory symptoms based on second-hand smoke  
14  
15 419 exposure in campuses (A: exposure in indoor campuses; B: exposure in outdoor  
16  
17 420 campuses).

18  
19  
20 421  
21  
22 422 **Figure 3.** Predicted prevalence of respiratory symptoms based on second-hand smoke  
23  
24 423 exposure from smoking teachers (A: exposure in indoor campuses; B: exposure in  
25  
26 424 outdoor campuses).

27  
28  
29 425  
30  
31 426 **Figure 4.** Predicted prevalence of respiratory symptoms based on second-hand smoke  
32  
33 427 exposure from smoking classmates (A: exposure in indoor campuses; B: exposure in  
34  
35 428 outdoor campuses).

36  
37  
38  
39 429  
40  
41  
42  
43  
44  
45  
46  
47  
48  
49  
50  
51  
52  
53  
54  
55  
56  
57  
58  
59  
60

430 **Table 1.** Demographic characteristics of the study participants

| Characteristics                      | <i>n</i> | %    | Characteristics         | <i>n</i> | %    |
|--------------------------------------|----------|------|-------------------------|----------|------|
| Respiratory symptoms                 |          |      | Grade                   |          |      |
| No                                   | 3098     | 86.7 | 1-2                     | 2329     | 65.2 |
| Yes                                  | 477      | 13.3 | 4-5                     | 1246     | 34.8 |
| SHS exposure in general              |          |      | Only-child              |          |      |
| No                                   | 1101     | 30.8 | No                      | 1353     | 37.8 |
| Yes                                  | 2474     | 69.2 | Yes                     | 2222     | 62.2 |
| SHS exposure in indoor public places |          |      | Gender                  |          |      |
| No                                   | 1806     | 50.5 | Male                    | 1818     | 50.9 |
| Yes                                  | 1769     | 49.5 | Female                  | 1757     | 49.1 |
| SHS exposure in homes                |          |      | Pocket money monthly(¥) |          |      |
| No                                   | 2342     | 65.5 | <100                    | 2039     | 57.0 |
| Yes                                  | 1233     | 34.5 | 100-399                 | 1125     | 31.5 |
| SHS exposure in indoor campuses      |          |      | ≥400                    | 411      | 11.5 |
| No                                   | 2763     | 77.3 | Father's education      |          |      |
| Yes                                  | 812      | 22.7 | Primary school          | 838      | 23.4 |
| SHS exposure in outdoor campuses     |          |      | Middle school           | 1215     | 34.0 |
| No                                   | 2532     | 70.8 | University and above    | 1522     | 42.6 |
| Yes                                  | 1043     | 29.2 | Mother's education      |          |      |
| Asthma history                       |          |      | Primary school          | 978      | 27.4 |
| No                                   | 3514     | 98.3 | Middle school           | 1165     | 32.6 |
| Yes                                  | 61       | 1.7  | University and above    | 1432     | 40.1 |

431 *n*, number of participants; %, the proportion of participants.

432

433

434 **Table 2.** Relation between binary SHS exposure and respiratory symptoms

| SHS exposure                                             | <i>n</i> | Respiratory symptoms (%) | Unadjusted OR(95%CI) | Adjusted OR(95%CI) <sup>a</sup> |
|----------------------------------------------------------|----------|--------------------------|----------------------|---------------------------------|
| SHS exposure in general                                  |          |                          |                      |                                 |
| No                                                       | 1101     | 106(9.6)                 | 1.00                 | 1.00                            |
| Yes                                                      | 2474     | 371(15.0)                | 1.66(1.32-2.08)      | 1.72(1.35-2.17)                 |
| SHS exposure in indoor public places                     |          |                          |                      |                                 |
| No                                                       | 1806     | 200(11.1)                | 1.00                 | 1.00                            |
| Yes                                                      | 1769     | 277(15.7)                | 1.49(1.23-1.81)      | 1.60(1.30-1.95)                 |
| SHS exposure in homes                                    |          |                          |                      |                                 |
| No                                                       | 2342     | 275(11.7)                | 1.00                 | 1.00                            |
| Yes                                                      | 1233     | 202(16.4)                | 1.47(1.21-1.79)      | 1.53(1.25-1.87)                 |
| SHS exposure in indoor campuses                          |          |                          |                      |                                 |
| No                                                       | 2763     | 338(12.2)                | 1.00                 | 1.00                            |
| Yes                                                      | 812      | 139(17.1)                | 1.48(1.19-1.84)      | 1.43(1.14-1.79)                 |
| SHS exposure in indoor campuses from smoking teachers    |          |                          |                      |                                 |
| No                                                       | 2940     | 369(12.6)                | 1.00                 | 1.00                            |
| Yes                                                      | 635      | 108(17.0)                | 1.43(1.13-1.80)      | 1.34(1.05-1.71)                 |
| SHS exposure in indoor campuses from smoking classmates  |          |                          |                      |                                 |
| No                                                       | 3149     | 399(12.7)                | 1.00                 | 1.00                            |
| Yes                                                      | 426      | 78(18.3)                 | 1.54(1.18-2.02)      | 1.54(1.15-2.06)                 |
| SHS exposure in outdoor campuses                         |          |                          |                      |                                 |
| No                                                       | 2532     | 309(12.2)                | 1.00                 | 1.00                            |
| Yes                                                      | 1043     | 168(16.1)                | 1.38(1.13-1.69)      | 1.37(1.10-1.69)                 |
| SHS exposure in outdoor campuses from smoking teachers   |          |                          |                      |                                 |
| No                                                       | 2917     | 362(12.4)                | 1.00                 | 1.00                            |
| Yes                                                      | 658      | 115(17.5)                | 1.49(1.19-1.88)      | 1.38(1.09-1.75)                 |
| SHS exposure in outdoor campuses from smoking classmates |          |                          |                      |                                 |
| No                                                       | 2873     | 366(12.7)                | 1.00                 | 1.00                            |
| Yes                                                      | 702      | 111(15.8)                | 1.29(1.02-1.62)      | 1.33(1.03-1.71)                 |

435 *n*, number of participants; SHS, second-hand smoke; OR, odds ratio; CI, confidence interval.436 <sup>a</sup>: adjusted for gender (male vs female), grade (4-5 vs 1-2), only-child (yes vs no) and asthma  
437 history (yes vs no).

438

439 **Table 3.** Relation between frequency of SHS exposure and respiratory symptoms

| Frequency of SHS exposure                                               | <i>n</i> | Respiratory symptoms (%) | Unadjusted OR(95%CI) | Adjusted OR(95%CI) <sup>a</sup> |
|-------------------------------------------------------------------------|----------|--------------------------|----------------------|---------------------------------|
| SHS exposure in indoor public places                                    |          |                          |                      |                                 |
| No exposure                                                             | 1806     | 200(11.1)                | 1.00                 | 1.00                            |
| 1-4 days/week                                                           | 1242     | 184(14.8)                | 1.40(1.13-1.73)      | 1.50(1.20-1.86)                 |
| 5-7 days/week                                                           | 527      | 93(17.7)                 | 1.72(1.32-2.25)      | 1.87(1.41-2.46)                 |
| Continuous SHS in indoor public places <sup>b</sup>                     |          |                          | 2.06(1.52-2.80)      | 2.30(1.67-3.16)                 |
| SHS exposure in homes                                                   |          |                          |                      |                                 |
| No exposure                                                             | 2342     | 275(11.7)                | 1.00                 | 1.00                            |
| 1-4 days/week                                                           | 570      | 97(17.0)                 | 1.54(1.20-1.98)      | 1.62(1.25-2.09)                 |
| 5-7 days/week                                                           | 663      | 105(15.8)                | 1.41(1.11-1.80)      | 1.45(1.13-1.87)                 |
| Continuous SHS in homes <sup>b</sup>                                    |          |                          | 1.56(1.18-2.07)      | 1.64(1.23-2.20)                 |
| SHS exposure in indoor campuses                                         |          |                          |                      |                                 |
| No exposure                                                             | 2763     | 338(12.2)                | 1.00                 | 1.00                            |
| 1-4 days/week                                                           | 539      | 81(15.0)                 | 1.27(0.98-1.65)      | 1.24(0.95-1.63)                 |
| 5-7 days/week                                                           | 273      | 58(21.3)                 | 1.94(1.42-2.64)      | 1.84(1.32-2.56)                 |
| Continuous SHS in indoor campuses <sup>b</sup>                          |          |                          | 2.19(1.53-3.12)      | 2.09(1.42-3.07)                 |
| SHS exposure in indoor campuses from smoking teachers                   |          |                          |                      |                                 |
| No exposure                                                             | 2940     | 369(12.6)                | 1.00                 | 1.00                            |
| 1-4 days/week                                                           | 412      | 59(14.3)                 | 1.16(0.87-1.57)      | 1.13(0.84-1.53)                 |
| 5-7 days/week                                                           | 223      | 49(22.0)                 | 1.96(1.40-2.74)      | 1.78(1.25-2.53)                 |
| Continuous SHS in indoor campuses from smoking teachers <sup>b</sup>    |          |                          | 2.27(1.54-3.33)      | 2.06(1.37-3.09)                 |
| SHS exposure in indoor campuses from smoking classmates                 |          |                          |                      |                                 |
| No exposure                                                             | 3149     | 399(12.7)                | 1.00                 | 1.00                            |
| 1-4 days/week                                                           | 271      | 45(16.6)                 | 1.37(0.98-1.92)      | 1.38(0.97-1.97)                 |
| 5-7 days/week                                                           | 155      | 33(21.3)                 | 1.86(1.25-2.78)      | 1.84(1.20-2.82)                 |
| Continuous SHS in indoor campuses from smoking classmates <sup>b</sup>  |          |                          | 2.04(1.30-3.20)      | 2.00(1.22-3.26)                 |
| SHS exposure in outdoor campuses                                        |          |                          |                      |                                 |
| No exposure                                                             | 2532     | 309(12.2)                | 1.00                 | 1.00                            |
| 1-4 days/week                                                           | 704      | 105(14.9)                | 1.26(0.99-1.60)      | 1.28(1.01-1.64)                 |
| 5-7 days/week                                                           | 339      | 63(18.6)                 | 1.64(1.22-2.21)      | 1.56(1.13-2.15)                 |
| Continuous SHS exposure in outdoor campuses <sup>b</sup>                |          |                          | 1.79(1.27-2.51)      | 1.70(1.18-2.47)                 |
| SHS exposure in outdoor campuses from smoking teachers                  |          |                          |                      |                                 |
| No exposure                                                             | 2917     | 362(12.4)                | 1.00                 | 1.00                            |
| 1-4 days/week                                                           | 456      | 71(15.6)                 | 1.30(0.99-1.72)      | 1.24(0.94-1.64)                 |
| 5-7 days/week                                                           | 202      | 44(21.8)                 | 1.97(1.38-2.79)      | 1.74(1.20-2.50)                 |
| Continuous SHS in outdoor campuses from smoking teachers <sup>b</sup>   |          |                          | 2.53(1.71-3.74)      | 2.20(1.45-3.33)                 |
| SHS exposure in outdoor campuses from smoking classmates                |          |                          |                      |                                 |
| No exposure                                                             | 2873     | 366(12.7)                | 1.00                 | 1.00                            |
| 1-4 days/week                                                           | 451      | 62(13.8)                 | 1.09(0.82-1.46)      | 1.16(0.86-1.57)                 |
| 5-7 days/week                                                           | 251      | 49(19.5)                 | 1.66(1.19-2.31)      | 1.66(1.16-2.39)                 |
| Continuous SHS in outdoor campuses from smoking classmates <sup>b</sup> |          |                          | 1.55(1.05-2.30)      | 1.58(1.03-2.42)                 |

440 *n*, number of participants; SHS, second-hand smoke; OR, odds ratio; CI, confidence interval.441 <sup>a</sup>: adjusted for gender (male vs female), grade (4-5 vs 1-2), only-child (yes vs no) and asthma  
442 history (yes vs no).443 <sup>b</sup>: Use logarithmic exposure (days/week) in the model.



Figure 1. Predicted prevalence of respiratory symptoms based on second-hand smoke exposure (A: exposure in indoor public places; B: exposure in homes).

124x63mm (300 x 300 DPI)

review only



Figure 2. Predicted prevalence of respiratory symptoms based on second-hand smoke exposure in campuses (A: exposure in indoor campuses; B: exposure in outdoor campuses).

125x64mm (300 x 300 DPI)

1  
2  
3  
4  
5  
6  
7  
8  
9  
10  
11  
12  
13  
14  
15  
16  
17  
18  
19  
20  
21  
22  
23  
24  
25  
26  
27  
28  
29  
30  
31  
32  
33  
34  
35  
36  
37  
38  
39  
40  
41  
42  
43  
44  
45  
46  
47  
48  
49  
50  
51  
52  
53  
54  
55  
56  
57  
58  
59  
60



Figure 3. Predicted prevalence of respiratory symptoms based on second-hand smoke exposure from smoking teachers (A: exposure in indoor campuses; B: exposure in outdoor campuses).

124x63mm (300 x 300 DPI)

review only





Figure 4. Predicted prevalence of respiratory symptoms based on second-hand smoke exposure from smoking classmates (A: exposure in indoor campuses; B: exposure in outdoor campuses).

124x63mm (300 x 300 DPI)

**STROBE 2007 (v4) Statement—Checklist of items that should be included in reports of *cross-sectional studies***

| Section/Topic                | Item # | Recommendation                                                                                                                                                                       | Reported on page # |
|------------------------------|--------|--------------------------------------------------------------------------------------------------------------------------------------------------------------------------------------|--------------------|
| <b>Title and abstract</b>    | 1      | (a) Indicate the study's design with a commonly used term in the title or the abstract                                                                                               | 2                  |
|                              |        | (b) Provide in the abstract an informative and balanced summary of what was done and what was found                                                                                  | 2                  |
| <b>Introduction</b>          |        |                                                                                                                                                                                      |                    |
| Background/rationale         | 2      | Explain the scientific background and rationale for the investigation being reported                                                                                                 | 4-5                |
| Objectives                   | 3      | State specific objectives, including any prespecified hypotheses                                                                                                                     | 5                  |
| <b>Methods</b>               |        |                                                                                                                                                                                      |                    |
| Study design                 | 4      | Present key elements of study design early in the paper                                                                                                                              | 5                  |
| Setting                      | 5      | Describe the setting, locations, and relevant dates, including periods of recruitment, exposure, follow-up, and data collection                                                      | 5                  |
| Participants                 | 6      | (a) Give the eligibility criteria, and the sources and methods of selection of participants                                                                                          | 5                  |
| Variables                    | 7      | Clearly define all outcomes, exposures, predictors, potential confounders, and effect modifiers. Give diagnostic criteria, if applicable                                             | 6-7                |
| Data sources/<br>measurement | 8*     | For each variable of interest, give sources of data and details of methods of assessment (measurement). Describe comparability of assessment methods if there is more than one group | 6-7                |
| Bias                         | 9      | Describe any efforts to address potential sources of bias                                                                                                                            | 6-7                |
| Study size                   | 10     | Explain how the study size was arrived at                                                                                                                                            | 5-6                |
| Quantitative variables       | 11     | Explain how quantitative variables were handled in the analyses. If applicable, describe which groupings were chosen and why                                                         | 6-7                |
| Statistical methods          | 12     | (a) Describe all statistical methods, including those used to control for confounding                                                                                                | 7                  |
|                              |        | (b) Describe any methods used to examine subgroups and interactions                                                                                                                  | 7                  |
|                              |        | (c) Explain how missing data were addressed                                                                                                                                          | No missing data    |
|                              |        | (d) If applicable, describe analytical methods taking account of sampling strategy                                                                                                   | No applicable      |
|                              |        | (e) Describe any sensitivity analyses                                                                                                                                                | 7                  |
| <b>Results</b>               |        |                                                                                                                                                                                      |                    |

|                          |     |                                                                                                                                                                                                              |               |
|--------------------------|-----|--------------------------------------------------------------------------------------------------------------------------------------------------------------------------------------------------------------|---------------|
| Participants             | 13* | (a) Report numbers of individuals at each stage of study—eg numbers potentially eligible, examined for eligibility, confirmed eligible, included in the study, completing follow-up, and analysed            | 8             |
|                          |     | (b) Give reasons for non-participation at each stage                                                                                                                                                         | 8             |
|                          |     | (c) Consider use of a flow diagram                                                                                                                                                                           | No applicable |
| Descriptive data         | 14* | (a) Give characteristics of study participants (eg demographic, clinical, social) and information on exposures and potential confounders                                                                     | 8             |
|                          |     | (b) Indicate number of participants with missing data for each variable of interest                                                                                                                          | 8             |
| Outcome data             | 15* | Report numbers of outcome events or summary measures                                                                                                                                                         | 8             |
| Main results             | 16  | (a) Give unadjusted estimates and, if applicable, confounder-adjusted estimates and their precision (eg, 95% confidence interval). Make clear which confounders were adjusted for and why they were included | 8-10          |
|                          |     | (b) Report category boundaries when continuous variables were categorized                                                                                                                                    | 8-10          |
|                          |     | (c) If relevant, consider translating estimates of relative risk into absolute risk for a meaningful time period                                                                                             | No applicable |
| Other analyses           | 17  | Report other analyses done—eg analyses of subgroups and interactions, and sensitivity analyses                                                                                                               | No applicable |
| <b>Discussion</b>        |     |                                                                                                                                                                                                              |               |
| Key results              | 18  | Summarise key results with reference to study objectives                                                                                                                                                     | 10            |
| Limitations              | 19  | Discuss limitations of the study, taking into account sources of potential bias or imprecision. Discuss both direction and magnitude of any potential bias                                                   | 13-14         |
| Interpretation           | 20  | Give a cautious overall interpretation of results considering objectives, limitations, multiplicity of analyses, results from similar studies, and other relevant evidence                                   | 14            |
| Generalisability         | 21  | Discuss the generalisability (external validity) of the study results                                                                                                                                        | 13            |
| <b>Other information</b> |     |                                                                                                                                                                                                              |               |
| Funding                  | 22  | Give the source of funding and the role of the funders for the present study and, if applicable, for the original study on which the present article is based                                                | No funding    |

\*Give information separately for cases and controls in case-control studies and, if applicable, for exposed and unexposed groups in cohort and cross-sectional studies.

**Note:** An Explanation and Elaboration article discusses each checklist item and gives methodological background and published examples of transparent reporting. The STROBE checklist is best used in conjunction with this article (freely available on the Web sites of PLoS Medicine at <http://www.plosmedicine.org/>, Annals of Internal Medicine at <http://www.annals.org/>, and Epidemiology at <http://www.epidem.com/>). Information on the STROBE Initiative is available at [www.strobe-statement.org](http://www.strobe-statement.org).

# BMJ Open

## Frequency-risk relationships between second-hand smoke exposure and respiratory symptoms among adolescents: a cross-sectional study in South China

|                                 |                                                                                                                                                                                                                                                                                                                                                                                                                                                                                            |
|---------------------------------|--------------------------------------------------------------------------------------------------------------------------------------------------------------------------------------------------------------------------------------------------------------------------------------------------------------------------------------------------------------------------------------------------------------------------------------------------------------------------------------------|
| Journal:                        | <i>BMJ Open</i>                                                                                                                                                                                                                                                                                                                                                                                                                                                                            |
| Manuscript ID                   | bmjopen-2017-019875.R2                                                                                                                                                                                                                                                                                                                                                                                                                                                                     |
| Article Type:                   | Research                                                                                                                                                                                                                                                                                                                                                                                                                                                                                   |
| Date Submitted by the Author:   | 19-Jan-2018                                                                                                                                                                                                                                                                                                                                                                                                                                                                                |
| Complete List of Authors:       | Chen, Zhiyao; Guangdong Pharmaceutical University<br>Liu, Guocong; Guangzhou Yuexiu Center for Disease Control and Prevention<br>Chen, Jianying; Guangzhou Yuexiu District for Community Health Service Center of Baiyun Street<br>Li, Shunming; Guangdong Pharmaceutical University<br>Jiang, Ting; Guangzhou Yuexiu Center for Disease Control and Prevention<br>Xu, Bin; Guangzhou Yuexiu Center for Disease Control and Prevention<br>Ye, Xiaohua; Guangdong Pharmaceutical University |
| <b>Primary Subject Heading</b>: | Smoking and tobacco                                                                                                                                                                                                                                                                                                                                                                                                                                                                        |
| Secondary Subject Heading:      | Epidemiology, Public health, Respiratory medicine, Smoking and tobacco                                                                                                                                                                                                                                                                                                                                                                                                                     |
| Keywords:                       | second-hand smoke exposure, respiratory symptoms, adolescents                                                                                                                                                                                                                                                                                                                                                                                                                              |
|                                 |                                                                                                                                                                                                                                                                                                                                                                                                                                                                                            |

SCHOLARONE™  
Manuscripts

only

1  
2  
3  
4 **1 Frequency-risk relationships between second-hand smoke exposure and**  
5  
6 **2 respiratory symptoms among adolescents: a cross-sectional study in South China**  
7

8  
9 3 Zhiyao Chen MPH<sup>1,#</sup>, Guocong Liu MPH<sup>2,#</sup>, Jianying Chen BS<sup>3,#</sup>, Shunming Li MPH<sup>1</sup>,

10  
11 4 Ting Jiang BS<sup>2</sup>, Bin Xu MPH<sup>2</sup>, Xiaohua Ye PhD<sup>1,\*</sup>  
12

13 5 <sup>1</sup> School of Public Health, Guangdong Pharmaceutical University, Guangzhou, China.

14  
15 6 <sup>2</sup>Health Education Section, Guangzhou Yuexiu Center for Disease Control and Prevention,  
16  
17 7 Guangzhou, China.

18  
19 8 <sup>3</sup>General Department, Guangzhou Yuexiu District for Community Health Service Center of  
20  
21 9 Baiyun Street, Guangzhou, China  
22

23  
24  
25  
26  
27  
28  
29  
30  
31  
32  
33  
34  
35  
36  
37  
38  
39  
40  
41  
42  
43  
44  
45  
46  
47  
48  
49  
50  
51  
52  
53  
54  
55  
56  
57  
58  
59  
60

11 \*Correspondence to: Dr X. Ye, smalltomato@163.com.

13 # These authors contributed equally to this work.

15 **Word counts** of the manuscript (excluding references): 2830

1  
2  
3 20 **ABSTRACT**

4 21 **Objectives:** Although previous studies have suggested an association between second-hand smoke  
5  
6  
7 22 (SHS) exposure and respiratory symptoms, current evidence is inconsistent. Additionally, it  
8  
9  
10 23 remains unclear whether there are frequency-risk relationships between SHS exposure and  
11  
12 24 respiratory symptoms among adolescents.

13  
14 25 **Methods:** A cross-sectional survey was conducted using a stratified cluster sampling method to  
15  
16  
17 26 obtain a representative sample of high school students in Guangzhou, China. The respiratory  
18  
19 27 symptoms were defined as persistent cough or sputum for 3 consecutive months during the past 12  
20  
21 28 months. Self-reported SHS exposure was defined as non-smokers' inhalation of the smoke exhaled  
22  
23 29 from smokers on  $\geq 1$  day a week in the past 7 days. The univariable and multivariable logistic  
24  
25 30 regression models were fitted to explore the potential frequency-risk relationships between SHS  
26  
27 31 exposure and respiratory symptoms.

28  
29 32 **Results:** Among 3575 students, the overall prevalence of SHS exposure was 69.2%, including  
30  
31 33 49.5% for SHS in public places, 34.5% in homes, 22.7% in indoor campuses, and 29.2% in  
32  
33 34 outdoor campuses. There were significantly increased risks of having respiratory symptoms  
34  
35 35 corresponding to SHS exposure in public places (odds ratio [OR]=1.60, 95% CI 1.30-1.95), in  
36  
37 36 homes (OR=1.53, 95% CI 1.25-1.87), in indoor campuses (OR = 1.43, 95% CI 1.14-1.79) and in  
38  
39 37 outdoor campuses (OR = 1.37, 95% CI 1.10-1.69) using no exposure as reference. Notably, we  
40  
41 38 observed monotonically frequency-risk relationships between setting-specific (e.g., homes, public  
42  
43 39 places, and campuses) SHS exposure and respiratory symptoms.

44  
45 40 **Conclusion:** Our findings suggest that setting-specific SHS exposure is associated with a  
46  
47 41 significant, dose-dependent increase in risk of respiratory symptoms.  
48  
49

50  
51  
52  
53  
54  
55  
56 42

1  
2  
3  
4 43 **Strengths and limitations of this study**

5  
6 44 ■ This study aims to explore the potential frequency-risk relationship between SHS exposure  
7  
8 45 and respiratory symptoms, and adds to the literature by focusing on Chinese tobacco control  
9  
10  
11 46 and Chinese youth along with its global context.

12  
13 47 ■ This study differentiates SHS exposure in specific settings and specific sources to make  
14  
15  
16 48 exposure and potential associations clearer.

17  
18 49 ■ SHS exposure and respiratory symptoms were self-reported, which is a limitation.

19  
20 50 ■ Cross-sectional studies do not establish causal relationships but only depict associations. Our  
21  
22  
23 51 findings highlight the need for further longitudinal studies to establish the causal relationship  
24  
25  
26 52 and the biological mechanisms for the impact of SHS.

27  
28 53

## 54 INTRODUCTION

55 It is well established that inhaling second-hand smoke (SHS) is harmful and that no  
56 scientific evidence establishes a risk-free level of exposure.<sup>1,2</sup> Notably, a retrospective  
57 analysis of data from 192 countries revealed that 40% of children (including 35% of  
58 non-smoking women and 33% of non-smoking men) were exposed to SHS, and this  
59 exposure is estimated to result in an annual estimate of 603000 deaths attributable to  
60 SHS.<sup>3</sup> Global youth tobacco surveillance also reported that nearly half the adolescents  
61 worldwide were exposed to SHS at home (42.5%) and in public places (55.1%),  
62 which constitutes a substantial public health threat and demands urgent intervention.<sup>4</sup>  
63 China is the world's largest producer and consumer of tobacco. The 2010 Global  
64 Adult Tobacco Survey revealed that 72.4% adults in China were exposed to SHS, and  
65 the 2014 Chinese adolescents Tobacco Survey also reported that 72.9% adolescents in  
66 China had SHS exposure, suggesting that the tremendous burden from  
67 tobacco-induced diseases makes tobacco prevention an essential health priority in  
68 China.<sup>5,6</sup> In recent years, much attention has been focused on SHS exposure in public  
69 places and in homes, but there is limited reports on SHS exposure in indoor and  
70 outdoor campuses among adolescents.

71 Epidemiological studies of adolescents have explored the associations between  
72 SHS exposure and respiratory symptoms (such as nose irritation, coughing, and sore  
73 throat) or infection,<sup>7-11</sup> but current evidence is inconsistent. Some studies  
74 demonstrated significantly positive associations,<sup>12,13</sup> while the report from Malaysia  
75 revealed no association.<sup>14</sup> Recent Chinese studies indicated that there were positive



1  
2  
3  
4 76 associations between household SHS exposure and respiratory symptoms in  
5  
6 77 adolescents, but the association for SHS exposure in public places or in schools was  
7  
8 78 unknown.<sup>15,16</sup> SHS exposure occurs in varying amounts in public places, homes, and  
9  
10  
11 79 other indoor spaces, but few studies have differentiated SHS exposure in indoor and  
12  
13 80 outdoor to make the setting-specific relationships between SHS exposure and  
14  
15 81 respiratory symptoms clearer. Of particular concern is that little is known about the  
16  
17 82 effects of campus SHS exposure on respiratory symptoms. Furthermore, it was  
18  
19 83 unclear whether there are dose–response relationships between SHS exposure and  
20  
21 84 respiratory symptoms. This study builds on previous literature to explore  
22  
23 85 setting-specific (e.g., public places, homes, and campuses) and frequency-risk  
24  
25 86 relationships between SHS exposure and respiratory symptoms among adolescents.  
26  
27  
28  
29  
30  
31  
32

## 33 **METHODS**

### 34 **Ethics statement**

35  
36  
37 90 The study was approved by the Ethics Committee of Guangdong Pharmaceutical  
38  
39 91 University, and it was performed in accordance with the approved guidelines. The  
40  
41 92 goals of the study were given to study participants and they should express their  
42  
43 93 willingness to participate. Before participating, written informed consents were  
44  
45 94 obtained from their parents or guardians.  
46  
47  
48  
49

### 50 **Study design and data collection**

51  
52  
53 97 This cross-sectional study was conducted in Guangzhou, China, from March to April  
54  
55  
56  
57

1  
2  
3 98 2016. The target population was high school students. A stratified cluster sampling  
4  
5  
6 99 process was used to obtain a representative sample. Notably, middle schools in most  
7  
8  
9 100 part of China are generally rated by the Bureau of Education as key schools (or  
10  
11 101 prestigious schools) and ordinary schools (or non-prestigious schools) according to  
12  
13 102 level of education and the education quality. In the first stage, all high schools were  
14  
15 103 divided into two categories (prestigious or non-prestigious schools). Three high  
16  
17 104 schools were randomly sampled from prestigious schools, and four high schools were  
18  
19 105 randomly sampled from non-prestigious schools, with the probability of selection  
20  
21 106 proportional to the number of the schools. In the second stage, classes in the selected  
22  
23 107 schools were randomly sampled with proportional to school enrollment size, and all  
24  
25 108 students in sampled classes were eligible to participate.  
26  
27  
28

29  
30 109 All interviewers in each school were centrally trained to ensure that the survey  
31  
32 110 was carried out according to the protocol and operation procedures were identical  
33  
34 111 across all areas. After obtaining informed consent, eligible students were asked to  
35  
36 112 complete a face-to-face survey by trained interviewers. A total of 3833 participants  
37  
38 113 were enrolled in this study, and the effective response rate was 95.4% (3657/3833).  
39  
40 114 Only non-smokers were included in the analyses and a total of 3575 non-smokers  
41  
42 115 were included in this study.  
43  
44  
45  
46  
47

48 116

### 49 117 **Study variables**

50  
51  
52 118 The main outcome variable was self-reported respiratory symptoms. The respiratory  
53  
54 119 symptoms were defined as persistent cough or sputum for 3 consecutive months  
55  
56  
57

1  
2  
3  
4 120 during the past 12 months.<sup>17-19</sup> The main independent variable of respiratory  
5  
6 121 symptoms was self-reported SHS exposure, which was defined as non-smokers'  
7  
8 122 inhalation of the smoke exhaled from smokers on  $\geq 1$  day a week in the past 7 days for  
9  
10  
11 123 at least 6 months (first question: "In the past 7 days, how many days did you breathe  
12  
13 124 in SHS in homes (or indoor public places, indoor campuses, outdoor campuses)";  
14  
15  
16 125 second question for those having SHS exposure: "Did you breathe in SHS in this  
17  
18 126 venue for at least 6 months?"). In order to recall SHS exposure for at least 6 months,  
19  
20  
21 127 we use both curriculum schedules and calendars as an assistive device to facilitate  
22  
23 128 recall the time. Frequency of SHS exposure was continuous data (days/week), and  
24  
25  
26 129 was also categorized into three groups:  $< 1$  day/week (no exposure), '1-4 days/week'  
27  
28 130 and '5-7 days/week'. Smoking status was classified as non-smokers and smokers  
29  
30  
31 131 (defined as 'has smoked over 100 cigarettes in their lifetime').

32  
33 132 Covariates including potential mediators and confounders were chosen a priori  
34  
35 133 on the basis of literature review. Potential covariates in our study included age (year),  
36  
37  
38 134 gender (male or female), grade (4-5 or 1-2), only-child (yes or no), monthly pocket  
39  
40 135 money ( $< \text{¥}100$ ,  $\text{¥}100\text{-}399$ , or  $\geq \text{¥}400$ ), prestigious school (yes or no), father's  
41  
42  
43 136 education (primary school, middle school, or university and above), mother's  
44  
45 137 education (primary school, middle school, or university and above), and asthma  
46  
47  
48 138 history (yes or no).

49  
50 139

#### 51 52 140 **Data analysis**

53  
54  
55 141 All data were entered in duplicate into EpiData version 3.1 database (The EpiData  
56  
57

1  
2  
3  
4 142 Association, Odense Denmark). The univariable and multivariable logistic regression  
5  
6 143 models were fitted to calculate the odds ratios (ORs) and 95% confidence intervals  
7  
8 144 (CIs) for evaluating the frequency-risk relationships between SHS exposure  
9  
10 145 (including ordinal and continuous variables) and respiratory symptoms. Linear trends  
11  
12 146 of SHS exposure were assessed by modeling exposure as continuous variables  
13  
14 147 (arithmetic or logarithmic scale) or ordinal variables in multivariable models.  
15  
16 148 Two-sided p-value of <0.05 was regarded as being of statistical significance. All  
17  
18 149 statistical analyses were conducted using Stata version 14.0 (StataCorp LP, College  
19  
20  
21 150 Station, Texas, USA).  
22  
23  
24  
25

26 151

## 27 152 **RESULTS**

### 28 153 **Characteristics of the sample**

29  
30  
31  
32 154 A total of 3575 non-smoking students were interviewed, of whom 477 (13.3%) were  
33  
34 155 classified as having respiratory symptoms. Participants' mean age was  $15.0 \pm 1.8$   
35  
36 156 years, and 50.9% were male students. About 62.2% of the students were the only child  
37  
38 157 in their family and 63.4% from prestigious schools. The overall prevalence of SHS  
39  
40 158 exposure was 69.2%, including 49.5% for SHS in indoor public places, 34.5% in  
41  
42 159 homes, 22.7% in indoor campuses, and 29.2% in outdoor campuses ([Table 1](#)).  
43  
44  
45  
46  
47

48 160

### 49 161 **Relationship between binary SHS exposure and respiratory symptoms**

50  
51  
52 162 The prevalence of respiratory symptoms was significantly higher in students with  
53  
54 163 SHS exposure (OR=1.72, 95% CI 1.35-2.17, for SHS in general; OR=1.60, 95% CI  
55  
56  
57

1  
2  
3  
4 164 1.30-1.95, for SHS in indoor public places; OR=1.53, 95% CI 1.25-1.87, for SHS in  
5  
6 165 homes; OR = 1.43, 95% CI 1.14-1.79, for SHS in indoor campuses) than in those with  
7  
8 166 no exposure (Table 2). Similar positive associations were observed in students with  
9  
10 167 SHS exposure in indoor campuses from smoking teachers (OR =1.34, 95% CI  
11  
12 168 1.05-1.71) or from smoking classmates (OR = 1.54, 95% CI 1.15-2.06). Notably, the  
13  
14 169 effects of SHS exposure in outdoor campuses cannot be ignored. Students with SHS  
15  
16 170 exposure in outdoor campuses had significantly higher rates of respiratory symptoms  
17  
18 171 (OR = 1.37, 95% CI 1.10-1.69) as compared with unexposed students, and there were  
19  
20 172 similar positive associations between respiratory symptoms and SHS exposure in  
21  
22 173 outdoor campuses from smoking teachers (OR =1.38, 95% CI 1.09-1.75) or from  
23  
24 174 smoking classmates (OR = 1.33, 95% CI 1.03-1.71).

25  
26  
27  
28  
29  
30  
31  
32 175

### 33 176 **Relationship between ordinal SHS exposure and respiratory symptoms**

34  
35 177 Compared with no SHS exposure, ordinal frequency of SHS exposure was associated  
36  
37 178 with respiratory symptoms in an increasing manner (SHS in public places: OR=1 for  
38  
39 179 no exposure, OR=1.50 for 1-4 days/week, OR=1.87 for 5-7 days/week,  $p$  for linear  
40  
41 180 trend <0.001; SHS in indoor campuses: OR=1 for no exposure, OR=1.24 for 1-4  
42  
43 181 days/week, OR=1.84 for 5-7 days/week,  $p$  for linear trend <0.001; Table 3). When  
44  
45 182 examining these associations by source of exposure, significant increasing trends  
46  
47 183 were observed for SHS exposure in indoor campuses from smoking teachers ( $p$  for  
48  
49 184 linear trend =0.001) and from smoking classmates ( $p$  for linear trend =0.005).  
50  
51  
52  
53  
54  
55 185 Additionally, there was a significantly increasing relationship between ordinal  
56  
57  
58  
59  
60

1  
2  
3  
4 186 frequency of SHS exposure in outdoor campuses and respiratory symptoms (OR=1  
5  
6 187 for no exposure, OR=1.28 for 1-4 days/week, OR=1.56 for 5-7 days/week,  $p$  for linear  
7  
8 188 trend =0.007; [Table 3](#)), and similar increasing trends were observed for SHS exposure  
9  
10  
11 189 in outdoor campuses from smoking teachers ( $p$  for linear trend =0.004) and from  
12  
13 190 smoking classmates ( $p$  for linear trend =0.006). However, no increasing trend was  
14  
15  
16 191 observed for SHS exposure in homes.  
17  
18  
19  
20

### 21 **Relationship between continuous SHS exposure and respiratory symptoms**

22  
23 194 As to continuous SHS exposure, there were significant frequency-risk relationships  
24  
25 195 between indoor SHS exposure and respiratory symptoms (OR = 2.30, 95% CI:  
26  
27  
28 196 1.67-3.16, for SHS in indoor public places; OR = 1.64, 95% CI: 1.23-2.20, for SHS in  
29  
30  
31 197 homes; OR = 2.09, 95% CI: 1.42-3.07, for SHS in indoor campuses; OR = 1.70, 95%  
32  
33 198 CI: 1.18-2.47, for SHS in outdoor campuses; [Table 3](#)). When examining these  
34  
35 199 associations by source of exposure, there were similar frequency-risk relationships for  
36  
37  
38 200 SHS exposure in indoor or outdoor campuses ([Table 3](#)). Additionally, we observed a  
39  
40  
41 201 monotonically increasing frequency-risk trend for SHS exposure in indoor public  
42  
43 202 places ([Figure 1A](#)), in homes ([Figure 1B](#)), in indoor campuses ([Figure 2A](#)) or in  
44  
45 203 outdoor campuses ([Figure 2B](#)). When examining these trends by source of exposure,  
46  
47  
48 204 there were similar increasing frequency-risk trends for SHS exposure from smoking  
49  
50 205 teachers ([Figure 3A](#) for indoor SHS and [Figure 3B](#) for outdoor SHS) and from  
51  
52 206 smoking classmates ([Figure 4A](#) for indoor SHS and [Figure 4B](#) for outdoor SHS).  
53  
54

55 207  
56  
57  
58  
59  
60

1  
2  
3  
4  
5  
6  
7  
8  
9  
10  
11  
12  
13  
14  
15  
16  
17  
18  
19  
20  
21  
22  
23  
24  
25  
26  
27  
28  
29  
30  
31  
32  
33  
34  
35  
36  
37  
38  
39  
40  
41  
42  
43  
44  
45  
46  
47  
48  
49  
50  
51  
52  
53  
54  
55  
56  
57  
58  
59  
60

208 **DISCUSSION**

209 This observational study showed that non-smoking students with setting-specific  
210 SHS exposure experienced significantly higher risks of respiratory symptoms than  
211 those with no exposure. The most striking findings from this study were that there  
212 were monotonically increasing frequency-risk relationships between setting-specific  
213 SHS exposure and respiratory symptoms. When examining these associations by  
214 source of exposure, there were similar monotonically increasing frequency-risk  
215 relationships for SHS exposure from smoking teachers and from smoking classmates.

216 It is well known that there is no risk-free level of exposure to SHS. Although  
217 previous studies have focused on SHS exposure among Chinese adolescents,<sup>15,16,20</sup>  
218 there is limited reports regarding SHS exposure in specific settings and specific  
219 sources. According to the partial smoke-free legislation implemented in Guangzhou  
220 on 1 September 2010, full smoke-free ban covered indoor campuses, outdoor  
221 campuses and most indoor public places, but did not cover homes. It is disappointing  
222 that SHS exposure in schools was not eliminated, and was still at a high level (22.7%  
223 for SHS exposure in indoor campuses; 29.2% for SHS exposure in outdoor campuses).  
224 This observation may be due to poor compliance with the full smoke-free ban in  
225 campuses, since we observed that SHS exposure among students was mainly from  
226 smoking teachers and smoking classmates in both indoor and outdoor campuses.  
227 Similarly, a recent population-based study in Tehran showed that about 30%  
228 non-smoking students have been exposed to SHS from smoking teachers in indoor or  
229 outdoor campuses,<sup>21</sup> and another survey of Chinese college students reported that

1  
2  
3  
4 230 37% of non-smokers had SHS exposure from smoking teachers.<sup>20</sup> More disappointing  
5  
6 231 was that SHS exposure in indoor public places was remarkably high in 49.5% in this  
7  
8 232 study, which is similar to results from the latest study on Guangzhou adults (50.3%)  
9  
10 233 and the Global Youth Tobacco Survey (47.8%).<sup>22,23</sup> After the implementation of a  
11  
12 234 smoke-free legislation, very few respondents (1-2%) reported smoking in public  
13  
14 235 places in England,<sup>24</sup> but smoking behaviors still remained high in public places in  
15  
16 236 Guangzhou because of unwillingness of the policymakers to implement tougher  
17  
18 237 smoke-free policies and poor compliance with the smoke-free law among smokers.<sup>23</sup>  
19  
20 238 These findings reveal that a partial smoke-free legislation has a weak impact on  
21  
22 239 smoking cessation, but a comprehensive smoke-free legislation can substantially  
23  
24 240 attenuate smoking behaviors, which point out the urgent need for a comprehensive  
25  
26 241 smoke-free legislation covering all public places in Guangzhou to protect the public  
27  
28 242 from SHS hazards.

29  
30  
31  
32  
33  
34  
35 243 A few published studies have indicated that SHS exposure may be a risk factor of  
36  
37 244 respiratory symptoms, but the potential relationship for setting-specific exposure was  
38  
39 245 still unclear.<sup>15,16,25,26</sup> Recent studies of Chinese adolescents indicated that there were  
40  
41 246 positive associations between household SHS exposure and respiratory symptoms, but  
42  
43 247 the association for SHS exposure in public places or in schools was unknown.<sup>15,16</sup> In  
44  
45 248 addition, the surveys of London casino workers and Shanghai workers revealed that  
46  
47 249 there was an significant association between SHS exposure at work and respiratory  
48  
49 250 symptoms, but the association for SHS exposure in homes or in public places was  
50  
51 251 unknown.<sup>25,26</sup> It is noteworthy that the influence of SHS exposure from indoor  
52  
53  
54  
55  
56  
57  
58  
59  
60



1  
2  
3  
4 252 campuses on respiratory symptoms is still unclear, and the potential dose-response  
5  
6 253 relationship between frequency of SHS exposure and respiratory symptoms is also  
7  
8 254 uncertain. We found that there were positive and frequency-risk relationships between  
9  
10 255 setting-specific SHS exposure and respiratory symptoms. When examining the  
11  
12 256 associations by source of exposure, there was still evidence of similar dose-response  
13  
14 257 relationships for SHS exposure in indoor campuses from smoking teachers and  
15  
16 258 smoking classmates. These findings provide new evidence of dose-response  
17  
18 259 relationships between SHS exposure and respiratory symptoms among adolescents.  
19  
20  
21  
22  
23 260 Further research is needed to establish the causal relationship, and confirm that  
24  
25 261 elimination of SHS exposure (or stricter smoke-free legislation in Guangzhou) will  
26  
27 262 lead to a reduction in respiratory symptoms among adolescents. Although the 2010  
28  
29 263 report of the Surgeon General explained beyond a shadow of a doubt how tobacco  
30  
31 264 smoke causes disease,<sup>27</sup> additional research should establish the potential biological  
32  
33 265 mechanisms for the impact of SHS.  
34  
35  
36

37  
38 266 Globally, outdoor smoking restrictions are uncommon, though the  
39  
40 267 outdoor-campus smoking bans implemented in Guangzhou City on 1 September 2010.  
41  
42 268 A few published studies have indicated that smoking increases PM<sub>2.5</sub> concentrations in  
43  
44 269 outdoor areas to levels that are potentially hazardous to health,<sup>28,29</sup> but research  
45  
46 270 linking SHS exposures from outdoor environments to health effects is still rare.  
47  
48 271 Notably, the potential relationship between outdoor SHS exposure and respiratory  
49  
50 272 symptoms is still unclear. To our knowledge, this is the first study to reveal the  
51  
52 273 relationship between SHS exposure in outdoor campuses and respiratory symptoms  
53  
54  
55  
56  
57  
58  
59  
60

1  
2  
3  
4 274 among adolescents, and found that outdoor SHS exposure was positively associated  
5  
6 275 with respiratory symptoms in a monotonically increasing trend. When examining the  
7  
8 276 associations by source of exposure, there were still similar frequency-risk  
9  
10 277 relationships for SHS exposure in outdoor campuses from smoking teachers and  
11  
12 278 smoking classmates. Although outdoor SHS is more transient than indoor SHS,  
13  
14 279 evidence from review of the research literature on SHS levels in outdoor hospitality  
15  
16 280 venues suggested that tobacco-generated PM<sub>2.5</sub> in outdoor setting may occasionally be  
17  
18 281 equivalent to or higher than levels observed in indoor setting when smoking is  
19  
20 282 permitted at close proximity.<sup>28</sup> These findings provide more evidence for the adverse  
21  
22 283 effects of outdoor SHS exposure on human respiratory symptoms, and also support  
23  
24 284 growing concern about SHS exposure in outdoor campuses. Future studies on school  
25  
26 285 SHS exposure in adolescents and protective measures against SHS should take  
27  
28 286 outdoor campuses SHS into consideration.

29  
30  
31  
32  
33  
34  
35 287 This study adds to the literature by focusing on Chinese tobacco control and  
36  
37 288 Chinese youth along with its global context. Additionally, we contribute additionally  
38  
39 289 to the literature by exploring the potential frequency-risk relationships and  
40  
41 290 differentiating SHS exposure in specific settings and specific sources to make  
42  
43 291 exposure and potential relationships clearer. There are also some potential limitations  
44  
45 292 in this study. First, all data was self-reported, including SHS exposure and respiratory  
46  
47 293 symptoms. For SHS exposure, biochemical measures can give objective  
48  
49 294 measurements, but cannot distinguish the sources of exposure, the key factors in this  
50  
51 295 study. A previous survey has found that school children are capable of reporting their  
52  
53  
54  
55  
56  
57  
58  
59  
60

1  
2  
3  
4 296 health conditions reliably,<sup>30</sup> and the presence of frequent cough and phlegm was quite  
5  
6 297 obvious to avoid measurement error. Second, causal association between SHS  
7  
8 298 exposure and respiratory symptoms could not be ascertained due to the cross-sectional  
9  
10  
11 299 design. However, the notion of reverse causation that students with respiratory  
12  
13 300 symptoms deliberately increased their exposure to noxious SHS seems improbable.  
14  
15 301 The strong associations observed in other studies also supported our data validity and  
16  
17 302 provided support for the deduction of causation.<sup>15,31,32</sup> Finally, few people would be  
18  
19 303 completely unexposed to SHS in densely populated Guangzhou even now, when  
20  
21 304 smoking was still allowed in public places (e.g., cafes, bars, night clubs, amusement  
22  
23 305 parks, restaurants, and workplaces). Therefore, the control groups who reported no  
24  
25 306 SHS exposure have probably underestimated their exposure, and the risk for  
26  
27 307 respiratory symptoms in these groups would also be underestimated.

28  
29  
30  
31  
32  
33 308 In conclusion, SHS exposure in indoor and outdoor campuses is still at a high  
34  
35 309 level, which suggests poor compliance with the full smoke-free ban in schools and  
36  
37 310 supports growing concern about SHS exposure in campuses. Additionally, this study  
38  
39 311 contributes to the literature by finding monotonically increasing frequency-risk  
40  
41 312 relationships between SHS exposure and respiratory symptoms among adolescents in  
42  
43 313 addition to differentiating SHS exposure in specific settings and specific sources to  
44  
45 314 make these relationships clearer. Future longitudinal studies are needed to establish  
46  
47 315 the causal relationship and the biological mechanisms for the impact of SHS.  
48  
49

50  
51  
52 316

53  
54  
55 317 **Contributors**

1  
2  
3  
4 318 CZ, LG, LS, JT, XB, CJ and YX were involved in the design of the study, data  
5  
6 319 analysis and writing of the draft of the manuscript. All the authors read and approved  
7  
8 320 the final version of the manuscript.  
9

10  
11 321

### 12 13 322 **Funding**

14  
15 323 The authors bore their own costs for conducting this study and hence no specific  
16  
17 324 funding line for this study.  
18  
19

20  
21 325

### 22 23 326 **Competing interests None.**

24  
25 327

### 26 27 328 **Ethics approval**

28  
29 329 The Ethics Committee of Guangdong Pharmaceutical University.  
30  
31

32  
33 330

### 34 35 331 **Data sharing statement**

36  
37 332 No additional data are available.  
38  
39  
40  
41  
42  
43  
44  
45  
46  
47  
48  
49  
50  
51  
52  
53  
54  
55  
56  
57  
58  
59  
60

333 **References**

- 334 1. Makadia LD, Roper PJ, Andrews JO, *et al.* Tobacco Use and Smoke Exposure in Children: New  
335 Trends, Harm, and Strategies to Improve Health Outcomes. *Curr Allergy Asthma Rep* 2017;17:55.
- 336 2. Office on Smoking and Health (US). The Health Consequences of Involuntary Exposure to Tobacco  
337 Smoke: A Report of the Surgeon General. Atlanta (GA): Centers for Disease Control and Prevention  
338 (US); 2006.
- 339 3. Oberg M, Jaakkola MS, Woodward A, *et al.* Worldwide burden of disease from exposure to  
340 second-hand smoke: a retrospective analysis of data from 192 countries. *Lancet* 2011;377:139-46.
- 341 4. Warren CW, Jones NR, Peruga A, *et al.* Global youth tobacco surveillance, 2000-2007. *MMWR*  
342 *Surveill Sum.* 2008;57:1-28.
- 343 5. Chinese Center for Disease Control and Prevention. Global Adult Tobacco Survey (GATS) China  
344 2010 Country Report: 2010. Available online: [http://www.notc.org.cn/newjcpjg/201304/W020121108](http://www.notc.org.cn/newjcpjg/201304/W020121108628365808856.pdf)  
345 [628365808856.pdf](http://www.notc.org.cn/newjcpjg/201304/W020121108628365808856.pdf).
- 346 6. Chinese Center for Disease Control and Prevention. Report on tobacco use in Chinese adolescents:  
347 2014. China: Beijing, Tobacco Control Office; 2014.
- 348 7. Hisam A, Rahman MU, Kadir E, *et al.* Proportion of exposure of passive smoking in teenage group  
349 and symptoms precipitated after exposure to second hand smoke. *J Coll Physicians Surg Pak*  
350 2014;24:446-8.
- 351 8. Schick SF, van den Vossenberg G, Luo A, *et al.* Thirty minute-exposure to aged cigarette smoke  
352 increases nasal congestion in nonsmokers. *J Toxicol Environ Health A* 2013;76:601-13.
- 353 9. Kabir Z, Manning PJ, Holohan J, *et al.* Second-hand smoke exposure in cars and respiratory health  
354 effects in children. *Eur Respir J* 2009;34:629-33.
- 355 10. Clark BR, Burkett SA, Andridge RR, *et al.* Evidence of high rates of undiagnosed asthma in  
356 central Ohio elementary schoolchildren. *J Sch Health* 2013;83:896-906.
- 357 11. Jones LL, Hashim A, McKeever T, *et al.* Parental and household smoking and the increased risk  
358 of bronchitis, bronchiolitis and other lower respiratory infections in infancy: systematic review and  
359 meta-analysis. *Respir Res* 2011;12:5.
- 360 12. Jang AS, Choi IS, Lee S, *et al.* The effect of passive smoking on asthma symptoms, atopy, and  
361 airway hyperresponsiveness in schoolchildren. *J Korean Med Sci* 2004;19:214-7.
- 362 13. Bakoula CG, Kafritsa YJ, Kavadias GD, *et al.* Objective passive-smoking indicators and  
363 respiratory morbidity in young children. *Lancet* 1995;346:280-1.
- 364 14. Zulkifli A, Abidin NZ, Abidin EZ, *et al.* Burden of household smoking habits on the occurrence of  
365 respiratory symptoms among Malaysian adolescents. *Iranian Journal of Public Health*  
366 2014;43:42-52.
- 367 15. Leung LT, Ho SY, Wang MP, *et al.* Exposure to secondhand smoke from neighbours and  
368 respiratory symptoms in never-smoking adolescents in Hong Kong: a cross-sectional study. *BMJ*  
369 *Open* 2015;5:e008607.
- 370 16. He QQ, Wong TW, Du L, *et al.* Environmental tobacco smoke exposure and Chinese  
371 schoolchildren's respiratory health: a prospective cohort study. *Am J Prev Med* 2011;41:487-93.
- 372 17. Peters J, Hedley AJ, Wong CM, *et al.* Effects of an ambient air pollution intervention and  
373 environmental tobacco smoke on children's respiratory health in Hong Kong. *Int J Epidemiol*  
374 1996;25:821-8.
- 375 18. Cotes JE, Chinn DJ. MRC questionnaire (MRCQ) on respiratory symptoms. *Occupational*

- 1  
2  
3 376 *Medicine* 2007;57:388.
- 4 377 19. Ho SY, Wang MP, Lo WS, *et al.* Comprehensive smoke-free legislation and displacement of  
5 378 smoking into the homes of young children in Hong Kong. *Tob Control* 2010;19:129-33.
- 6 379 20. Gong M, Liang ZY, Zhang YY, *et al.* Implementation of the Tobacco-Free Campus Policy on  
7 380 College Campuses: Evidence From a Survey of College Students in Beijing. *Nicotine Tob Res*  
8 381 2016;18:2083-91.
- 9 382 21. Emami H, Naserikouzehgarani G, Saeedfar K, *et al.* The Correlation of Student's Smoking and  
10 383 Their Perceived Exposure to Their Teacher's Smoking in Tehran: A Population Based Study. *Journal*  
11 384 *of Shahid Sadoughi University of Medical Sciences* 2010;18:98-110.
- 12 385 22. Centers for Disease Control and Prevention(CDC). Exposure to secondhand smoke among  
13 386 students aged 13-15 years--worldwide, 2000-2007. *MMWR Morb Mortal Wkly Rep*  
14 387 2007;56:497-500.
- 15 388 23. Ye X, Yao Z, Gao Y, *et al.* Second-hand smoke exposure in different types of venues: before and  
16 389 after the implementation of smoke-free legislation in Guangzhou, China. *BMJ Open*  
17 390 2014;4:e004273.
- 18 391 24. Lee JT, Glantz SA, Millett C. Effect of smoke-free legislation on adult smoking behaviour in  
19 392 England in the 18 months following implementation. *PLoS One* 2011;6:e20933.
- 20 393 25. Pilkington PA, Gray S, Gilmore AB. Health impacts of exposure to second hand smoke (SHS)  
21 394 amongst a highly exposed workforce: survey of London casino workers. *BMC Public Health*  
22 395 2007;7:257.
- 23 396 26. Zheng P, Li W, Chapman S, *et al.* Workplace exposure to secondhand smoke and its association  
24 397 with respiratory symptoms--a cross-sectional study among workers in Shanghai. *Tob Control*  
25 398 2011;20:58-63.
- 26 399 27. Centers for Disease Control and Prevention (US). How Tobacco Smoke Causes Disease: The  
27 400 Biology and Behavioral Basis for Smoking-Attributable Disease. Atlanta (GA): Centers for Disease  
28 401 Control and Prevention (US); 2010.
- 29 402 28. Licht AS, Hyland A, Travers MJ, *et al.* Secondhand smoke exposure levels in outdoor hospitality  
30 403 venues: a qualitative and quantitative review of the research literature. *Tob Control* 2013;22:172-9.
- 31 404 29. Stafford J, Daube M, Franklin P. Second hand smoke in alfresco areas. *Health Promot J Austr*  
32 405 2010;21:99-105.
- 33 406 30. Riley AW. Evidence that school-age children can self-report on their health. *Ambul Pediatr*  
34 407 2004;4:371-6.
- 35 408 31. Lai HK, Ho SY, Wang MP, *et al.* Secondhand smoke and respiratory symptoms among adolescent  
36 409 current smokers. *Pediatrics* 2009;124:1306-10.
- 37 410 32. Lam TH, Chung SF, Betson CL, *et al.* Respiratory symptoms due to active and passive smoking in  
38 411 junior secondary school students in Hong Kong. *Int J Epidemiol* 1998;27:41-8.

412

1  
2  
3  
4 413 **Figure Legends**

5  
6 414 **Figure 1.** Predicted prevalence of respiratory symptoms based on second-hand smoke  
7  
8 415 exposure (A: exposure in indoor public places; B: exposure in homes).  
9

10  
11 416

12  
13 417 **Figure 2.** Predicted prevalence of respiratory symptoms based on second-hand smoke  
14  
15 418 exposure in campuses (A: exposure in indoor campuses; B: exposure in outdoor  
16  
17 419 campuses).  
18  
19

20  
21 420

22  
23 421 **Figure 3.** Predicted prevalence of respiratory symptoms based on second-hand smoke  
24  
25 422 exposure from smoking teachers (A: exposure in indoor campuses; B: exposure in  
26  
27 423 outdoor campuses).  
28  
29

30  
31 424

32  
33 425 **Figure 4.** Predicted prevalence of respiratory symptoms based on second-hand smoke  
34  
35 426 exposure from smoking classmates (A: exposure in indoor campuses; B: exposure in  
36  
37 427 outdoor campuses).  
38  
39

40  
41 428  
42  
43  
44  
45  
46  
47  
48  
49  
50  
51  
52  
53  
54  
55  
56  
57  
58  
59  
60

429 **Table 1.** Demographic characteristics of the study participants

| Characteristics                      | <i>n</i> | %    | Characteristics         | <i>n</i> | %    |
|--------------------------------------|----------|------|-------------------------|----------|------|
| Respiratory symptoms                 |          |      | Grade                   |          |      |
| No                                   | 3098     | 86.7 | 1-2                     | 2329     | 65.2 |
| Yes                                  | 477      | 13.3 | 4-5                     | 1246     | 34.8 |
| SHS exposure in general              |          |      | Only-child              |          |      |
| No                                   | 1101     | 30.8 | No                      | 1353     | 37.8 |
| Yes                                  | 2474     | 69.2 | Yes                     | 2222     | 62.2 |
| SHS exposure in indoor public places |          |      | Gender                  |          |      |
| No                                   | 1806     | 50.5 | Male                    | 1818     | 50.9 |
| Yes                                  | 1769     | 49.5 | Female                  | 1757     | 49.1 |
| SHS exposure in homes                |          |      | Pocket money monthly(¥) |          |      |
| No                                   | 2342     | 65.5 | <100                    | 2039     | 57.0 |
| Yes                                  | 1233     | 34.5 | 100-399                 | 1125     | 31.5 |
| SHS exposure in indoor campuses      |          |      | ≥400                    | 411      | 11.5 |
| No                                   | 2763     | 77.3 | Father's education      |          |      |
| Yes                                  | 812      | 22.7 | Primary school          | 838      | 23.4 |
| SHS exposure in outdoor campuses     |          |      | Middle school           | 1215     | 34.0 |
| No                                   | 2532     | 70.8 | University and above    | 1522     | 42.6 |
| Yes                                  | 1043     | 29.2 | Mother's education      |          |      |
| Asthma history                       |          |      | Primary school          | 978      | 27.4 |
| No                                   | 3514     | 98.3 | Middle school           | 1165     | 32.6 |
| Yes                                  | 61       | 1.7  | University and above    | 1432     | 40.0 |

430 *n*, number of participants; %, the proportion of participants.

431

432



433 **Table 2.** Relationship between binary SHS exposure and respiratory symptoms

| SHS exposure                                             | <i>n</i> | Respiratory symptoms (%) | Unadjusted OR(95%CI) | Adjusted OR(95%CI) <sup>a</sup> |
|----------------------------------------------------------|----------|--------------------------|----------------------|---------------------------------|
| SHS exposure in general                                  |          |                          |                      |                                 |
| No                                                       | 1101     | 106(9.6)                 | 1.00                 | 1.00                            |
| Yes                                                      | 2474     | 371(15.0)                | 1.66(1.32-2.08)      | 1.72(1.35-2.17)                 |
| SHS exposure in indoor public places                     |          |                          |                      |                                 |
| No                                                       | 1806     | 200(11.1)                | 1.00                 | 1.00                            |
| Yes                                                      | 1769     | 277(15.7)                | 1.49(1.23-1.81)      | 1.60(1.30-1.95)                 |
| SHS exposure in homes                                    |          |                          |                      |                                 |
| No                                                       | 2342     | 275(11.7)                | 1.00                 | 1.00                            |
| Yes                                                      | 1233     | 202(16.4)                | 1.47(1.21-1.79)      | 1.53(1.25-1.87)                 |
| SHS exposure in indoor campuses                          |          |                          |                      |                                 |
| No                                                       | 2763     | 338(12.2)                | 1.00                 | 1.00                            |
| Yes                                                      | 812      | 139(17.1)                | 1.48(1.19-1.84)      | 1.43(1.14-1.79)                 |
| SHS exposure in indoor campuses from smoking teachers    |          |                          |                      |                                 |
| No                                                       | 2940     | 369(12.6)                | 1.00                 | 1.00                            |
| Yes                                                      | 635      | 108(17.0)                | 1.43(1.13-1.80)      | 1.34(1.05-1.71)                 |
| SHS exposure in indoor campuses from smoking classmates  |          |                          |                      |                                 |
| No                                                       | 3149     | 399(12.7)                | 1.00                 | 1.00                            |
| Yes                                                      | 426      | 78(18.3)                 | 1.54(1.18-2.02)      | 1.54(1.15-2.06)                 |
| SHS exposure in outdoor campuses                         |          |                          |                      |                                 |
| No                                                       | 2532     | 309(12.2)                | 1.00                 | 1.00                            |
| Yes                                                      | 1043     | 168(16.1)                | 1.38(1.13-1.69)      | 1.37(1.10-1.69)                 |
| SHS exposure in outdoor campuses from smoking teachers   |          |                          |                      |                                 |
| No                                                       | 2917     | 362(12.4)                | 1.00                 | 1.00                            |
| Yes                                                      | 658      | 115(17.5)                | 1.49(1.19-1.88)      | 1.38(1.09-1.75)                 |
| SHS exposure in outdoor campuses from smoking classmates |          |                          |                      |                                 |
| No                                                       | 2873     | 366(12.7)                | 1.00                 | 1.00                            |
| Yes                                                      | 702      | 111(15.8)                | 1.29(1.02-1.62)      | 1.33(1.03-1.71)                 |

434 *n*, number of participants; SHS, second-hand smoke; OR, odds ratio; CI, confidence interval.435 <sup>a</sup>: adjusted for gender (male vs female), grade (4-5 vs 1-2), only-child (yes vs no) and asthma  
436 history (yes vs no).

437

438 **Table 3.** Relationship between frequency of SHS exposure and respiratory symptoms

| Frequency of SHS exposure                                               | <i>n</i> | Respiratory symptoms (%) | Unadjusted OR(95%CI) | Adjusted OR(95%CI) <sup>a</sup> |
|-------------------------------------------------------------------------|----------|--------------------------|----------------------|---------------------------------|
| SHS exposure in indoor public places                                    |          |                          |                      |                                 |
| No exposure                                                             | 1806     | 200(11.1)                | 1.00                 | 1.00                            |
| 1-4 days/week                                                           | 1242     | 184(14.8)                | 1.40(1.13-1.73)      | 1.50(1.20-1.86)                 |
| 5-7 days/week                                                           | 527      | 93(17.7)                 | 1.72(1.32-2.25)      | 1.87(1.41-2.46)                 |
| Continuous SHS in indoor public places <sup>b</sup>                     |          |                          | 2.06(1.52-2.80)      | 2.30(1.67-3.16)                 |
| SHS exposure in homes                                                   |          |                          |                      |                                 |
| No exposure                                                             | 2342     | 275(11.7)                | 1.00                 | 1.00                            |
| 1-4 days/week                                                           | 570      | 97(17.0)                 | 1.54(1.20-1.98)      | 1.62(1.25-2.09)                 |
| 5-7 days/week                                                           | 663      | 105(15.8)                | 1.41(1.11-1.80)      | 1.45(1.13-1.87)                 |
| Continuous SHS in homes <sup>b</sup>                                    |          |                          | 1.56(1.18-2.07)      | 1.64(1.23-2.20)                 |
| SHS exposure in indoor campuses                                         |          |                          |                      |                                 |
| No exposure                                                             | 2763     | 338(12.2)                | 1.00                 | 1.00                            |
| 1-4 days/week                                                           | 539      | 81(15.0)                 | 1.27(0.98-1.65)      | 1.24(0.95-1.63)                 |
| 5-7 days/week                                                           | 273      | 58(21.3)                 | 1.94(1.42-2.64)      | 1.84(1.32-2.56)                 |
| Continuous SHS in indoor campuses <sup>b</sup>                          |          |                          | 2.19(1.53-3.12)      | 2.09(1.42-3.07)                 |
| SHS exposure in indoor campuses from smoking teachers                   |          |                          |                      |                                 |
| No exposure                                                             | 2940     | 369(12.6)                | 1.00                 | 1.00                            |
| 1-4 days/week                                                           | 412      | 59(14.3)                 | 1.16(0.87-1.57)      | 1.13(0.84-1.53)                 |
| 5-7 days/week                                                           | 223      | 49(22.0)                 | 1.96(1.40-2.74)      | 1.78(1.25-2.53)                 |
| Continuous SHS in indoor campuses from smoking teachers <sup>b</sup>    |          |                          | 2.27(1.54-3.33)      | 2.06(1.37-3.09)                 |
| SHS exposure in indoor campuses from smoking classmates                 |          |                          |                      |                                 |
| No exposure                                                             | 3149     | 399(12.7)                | 1.00                 | 1.00                            |
| 1-4 days/week                                                           | 271      | 45(16.6)                 | 1.37(0.98-1.92)      | 1.38(0.97-1.97)                 |
| 5-7 days/week                                                           | 155      | 33(21.3)                 | 1.86(1.25-2.78)      | 1.84(1.20-2.82)                 |
| Continuous SHS in indoor campuses from smoking classmates <sup>b</sup>  |          |                          | 2.04(1.30-3.20)      | 2.00(1.22-3.26)                 |
| SHS exposure in outdoor campuses                                        |          |                          |                      |                                 |
| No exposure                                                             | 2532     | 309(12.2)                | 1.00                 | 1.00                            |
| 1-4 days/week                                                           | 704      | 105(14.9)                | 1.26(0.99-1.60)      | 1.28(1.01-1.64)                 |
| 5-7 days/week                                                           | 339      | 63(18.6)                 | 1.64(1.22-2.21)      | 1.56(1.13-2.15)                 |
| Continuous SHS exposure in outdoor campuses <sup>b</sup>                |          |                          | 1.79(1.27-2.51)      | 1.70(1.18-2.47)                 |
| SHS exposure in outdoor campuses from smoking teachers                  |          |                          |                      |                                 |
| No exposure                                                             | 2917     | 362(12.4)                | 1.00                 | 1.00                            |
| 1-4 days/week                                                           | 456      | 71(15.6)                 | 1.30(0.99-1.72)      | 1.24(0.94-1.64)                 |
| 5-7 days/week                                                           | 202      | 44(21.8)                 | 1.97(1.38-2.79)      | 1.74(1.20-2.50)                 |
| Continuous SHS in outdoor campuses from smoking teachers <sup>b</sup>   |          |                          | 2.53(1.71-3.74)      | 2.20(1.45-3.33)                 |
| SHS exposure in outdoor campuses from smoking classmates                |          |                          |                      |                                 |
| No exposure                                                             | 2873     | 366(12.7)                | 1.00                 | 1.00                            |
| 1-4 days/week                                                           | 451      | 62(13.8)                 | 1.09(0.82-1.46)      | 1.16(0.86-1.57)                 |
| 5-7 days/week                                                           | 251      | 49(19.5)                 | 1.66(1.19-2.31)      | 1.66(1.16-2.39)                 |
| Continuous SHS in outdoor campuses from smoking classmates <sup>b</sup> |          |                          | 1.55(1.05-2.30)      | 1.58(1.03-2.42)                 |

439 *n*, number of participants; SHS, second-hand smoke; OR, odds ratio; CI, confidence interval.440 <sup>a</sup>: adjusted for gender (male vs female), grade (4-5 vs 1-2), only-child (yes vs no) and asthma  
441 history (yes vs no).442 <sup>b</sup>: Use logarithmic exposure (days/week) in the model.



Figure 1. Predicted prevalence of respiratory symptoms based on second-hand smoke exposure (A: exposure in indoor public places; B: exposure in homes).

124x63mm (300 x 300 DPI)

review only

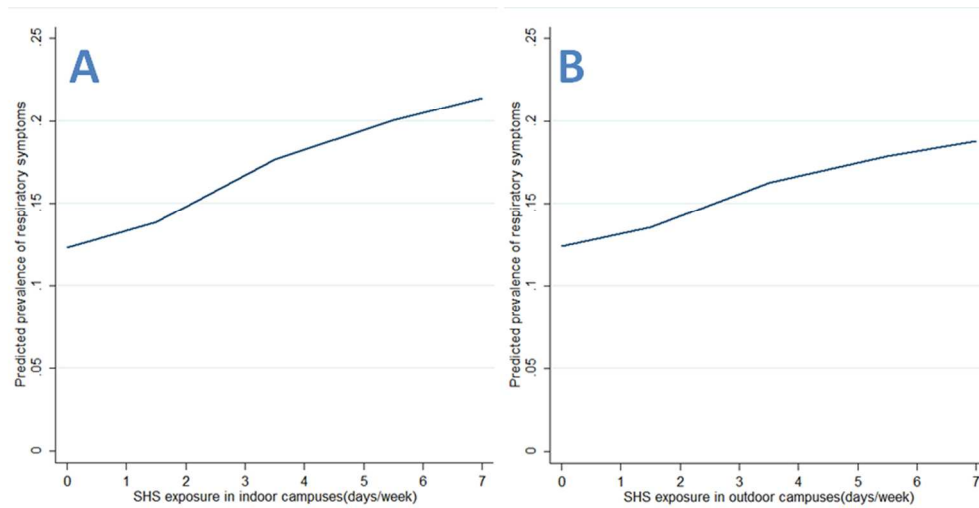

Figure 2. Predicted prevalence of respiratory symptoms based on second-hand smoke exposure in campuses (A: exposure in indoor campuses; B: exposure in outdoor campuses).

125x64mm (300 x 300 DPI)

1  
2  
3  
4  
5  
6  
7  
8  
9  
10  
11  
12  
13  
14  
15  
16  
17  
18  
19  
20  
21  
22  
23  
24  
25  
26  
27  
28  
29  
30  
31  
32  
33  
34  
35  
36  
37  
38  
39  
40  
41  
42  
43  
44  
45  
46  
47  
48  
49  
50  
51  
52  
53  
54  
55  
56  
57  
58  
59  
60



Figure 3. Predicted prevalence of respiratory symptoms based on second-hand smoke exposure from smoking teachers (A: exposure in indoor campuses; B: exposure in outdoor campuses).

124x63mm (300 x 300 DPI)

review only



Figure 4. Predicted prevalence of respiratory symptoms based on second-hand smoke exposure from smoking classmates (A: exposure in indoor campuses; B: exposure in outdoor campuses).

124x63mm (300 x 300 DPI)

**STROBE 2007 (v4) Statement—Checklist of items that should be included in reports of *cross-sectional studies***

| Section/Topic                | Item # | Recommendation                                                                                                                                                                       | Reported on page # |
|------------------------------|--------|--------------------------------------------------------------------------------------------------------------------------------------------------------------------------------------|--------------------|
| <b>Title and abstract</b>    | 1      | (a) Indicate the study's design with a commonly used term in the title or the abstract                                                                                               | 2                  |
|                              |        | (b) Provide in the abstract an informative and balanced summary of what was done and what was found                                                                                  | 2                  |
| <b>Introduction</b>          |        |                                                                                                                                                                                      |                    |
| Background/rationale         | 2      | Explain the scientific background and rationale for the investigation being reported                                                                                                 | 4-5                |
| Objectives                   | 3      | State specific objectives, including any prespecified hypotheses                                                                                                                     | 5                  |
| <b>Methods</b>               |        |                                                                                                                                                                                      |                    |
| Study design                 | 4      | Present key elements of study design early in the paper                                                                                                                              | 5                  |
| Setting                      | 5      | Describe the setting, locations, and relevant dates, including periods of recruitment, exposure, follow-up, and data collection                                                      | 5                  |
| Participants                 | 6      | (a) Give the eligibility criteria, and the sources and methods of selection of participants                                                                                          | 5                  |
| Variables                    | 7      | Clearly define all outcomes, exposures, predictors, potential confounders, and effect modifiers. Give diagnostic criteria, if applicable                                             | 6-7                |
| Data sources/<br>measurement | 8*     | For each variable of interest, give sources of data and details of methods of assessment (measurement). Describe comparability of assessment methods if there is more than one group | 6-7                |
| Bias                         | 9      | Describe any efforts to address potential sources of bias                                                                                                                            | 6-7                |
| Study size                   | 10     | Explain how the study size was arrived at                                                                                                                                            | 5-6                |
| Quantitative variables       | 11     | Explain how quantitative variables were handled in the analyses. If applicable, describe which groupings were chosen and why                                                         | 6-7                |
| Statistical methods          | 12     | (a) Describe all statistical methods, including those used to control for confounding                                                                                                | 7                  |
|                              |        | (b) Describe any methods used to examine subgroups and interactions                                                                                                                  | 7                  |
|                              |        | (c) Explain how missing data were addressed                                                                                                                                          | No missing data    |
|                              |        | (d) If applicable, describe analytical methods taking account of sampling strategy                                                                                                   | No applicable      |
|                              |        | (e) Describe any sensitivity analyses                                                                                                                                                | 7                  |
| <b>Results</b>               |        |                                                                                                                                                                                      |                    |

|                          |     |                                                                                                                                                                                                              |               |
|--------------------------|-----|--------------------------------------------------------------------------------------------------------------------------------------------------------------------------------------------------------------|---------------|
| Participants             | 13* | (a) Report numbers of individuals at each stage of study—eg numbers potentially eligible, examined for eligibility, confirmed eligible, included in the study, completing follow-up, and analysed            | 8             |
|                          |     | (b) Give reasons for non-participation at each stage                                                                                                                                                         | 8             |
|                          |     | (c) Consider use of a flow diagram                                                                                                                                                                           | No applicable |
| Descriptive data         | 14* | (a) Give characteristics of study participants (eg demographic, clinical, social) and information on exposures and potential confounders                                                                     | 8             |
|                          |     | (b) Indicate number of participants with missing data for each variable of interest                                                                                                                          | 8             |
| Outcome data             | 15* | Report numbers of outcome events or summary measures                                                                                                                                                         | 8             |
| Main results             | 16  | (a) Give unadjusted estimates and, if applicable, confounder-adjusted estimates and their precision (eg, 95% confidence interval). Make clear which confounders were adjusted for and why they were included | 8-10          |
|                          |     | (b) Report category boundaries when continuous variables were categorized                                                                                                                                    | 8-10          |
|                          |     | (c) If relevant, consider translating estimates of relative risk into absolute risk for a meaningful time period                                                                                             | No applicable |
| Other analyses           | 17  | Report other analyses done—eg analyses of subgroups and interactions, and sensitivity analyses                                                                                                               | No applicable |
| <b>Discussion</b>        |     |                                                                                                                                                                                                              |               |
| Key results              | 18  | Summarise key results with reference to study objectives                                                                                                                                                     | 10            |
| Limitations              | 19  | Discuss limitations of the study, taking into account sources of potential bias or imprecision. Discuss both direction and magnitude of any potential bias                                                   | 13-14         |
| Interpretation           | 20  | Give a cautious overall interpretation of results considering objectives, limitations, multiplicity of analyses, results from similar studies, and other relevant evidence                                   | 14            |
| Generalisability         | 21  | Discuss the generalisability (external validity) of the study results                                                                                                                                        | 13            |
| <b>Other information</b> |     |                                                                                                                                                                                                              |               |
| Funding                  | 22  | Give the source of funding and the role of the funders for the present study and, if applicable, for the original study on which the present article is based                                                | No funding    |

\*Give information separately for cases and controls in case-control studies and, if applicable, for exposed and unexposed groups in cohort and cross-sectional studies.

**Note:** An Explanation and Elaboration article discusses each checklist item and gives methodological background and published examples of transparent reporting. The STROBE checklist is best used in conjunction with this article (freely available on the Web sites of PLoS Medicine at <http://www.plosmedicine.org/>, Annals of Internal Medicine at <http://www.annals.org/>, and Epidemiology at <http://www.epidem.com/>). Information on the STROBE Initiative is available at [www.strobe-statement.org](http://www.strobe-statement.org).
